# Supplementary material for: Very‐low‐carbohydrate diet enhances human T‐cell immunity through immunometabolic reprogramming
Source: PubMed Central journal article supplement (PMC8350890; doi:10.15252/emmm.202114323), 2021-06-21

# Source Data – FIGURE 3

Figure 3c unprocessed images  
*CD4 NC*

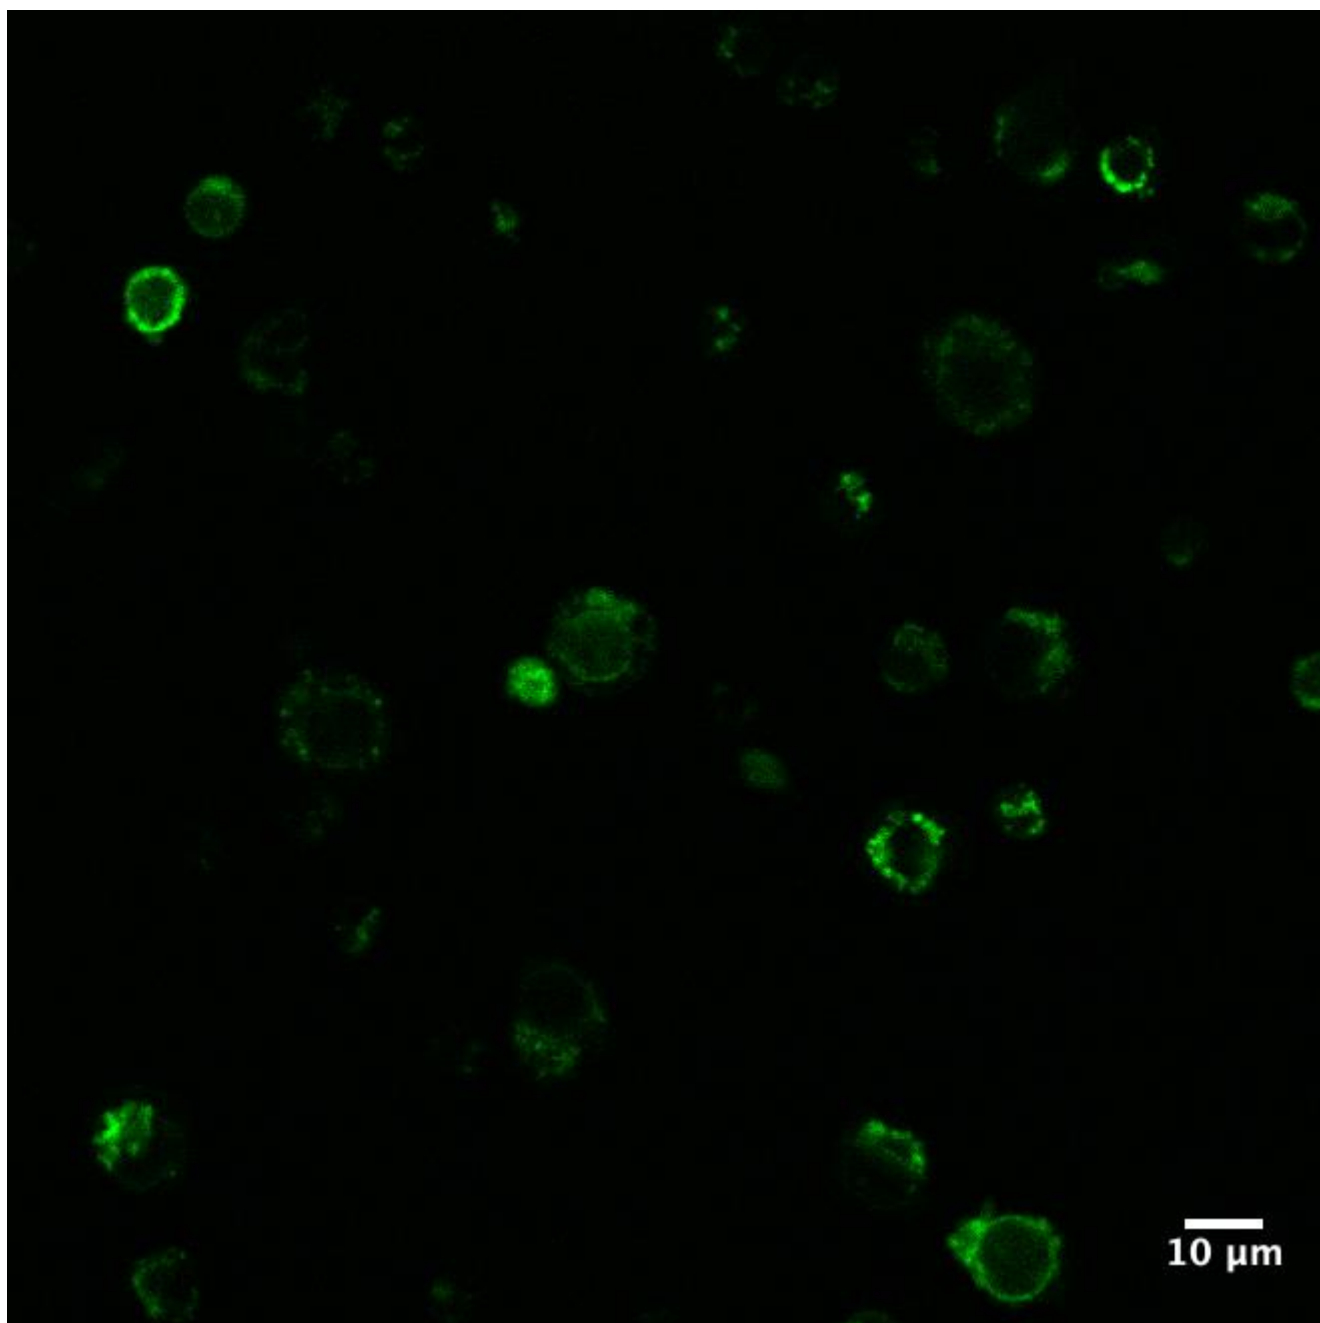

*CD4 BHB*

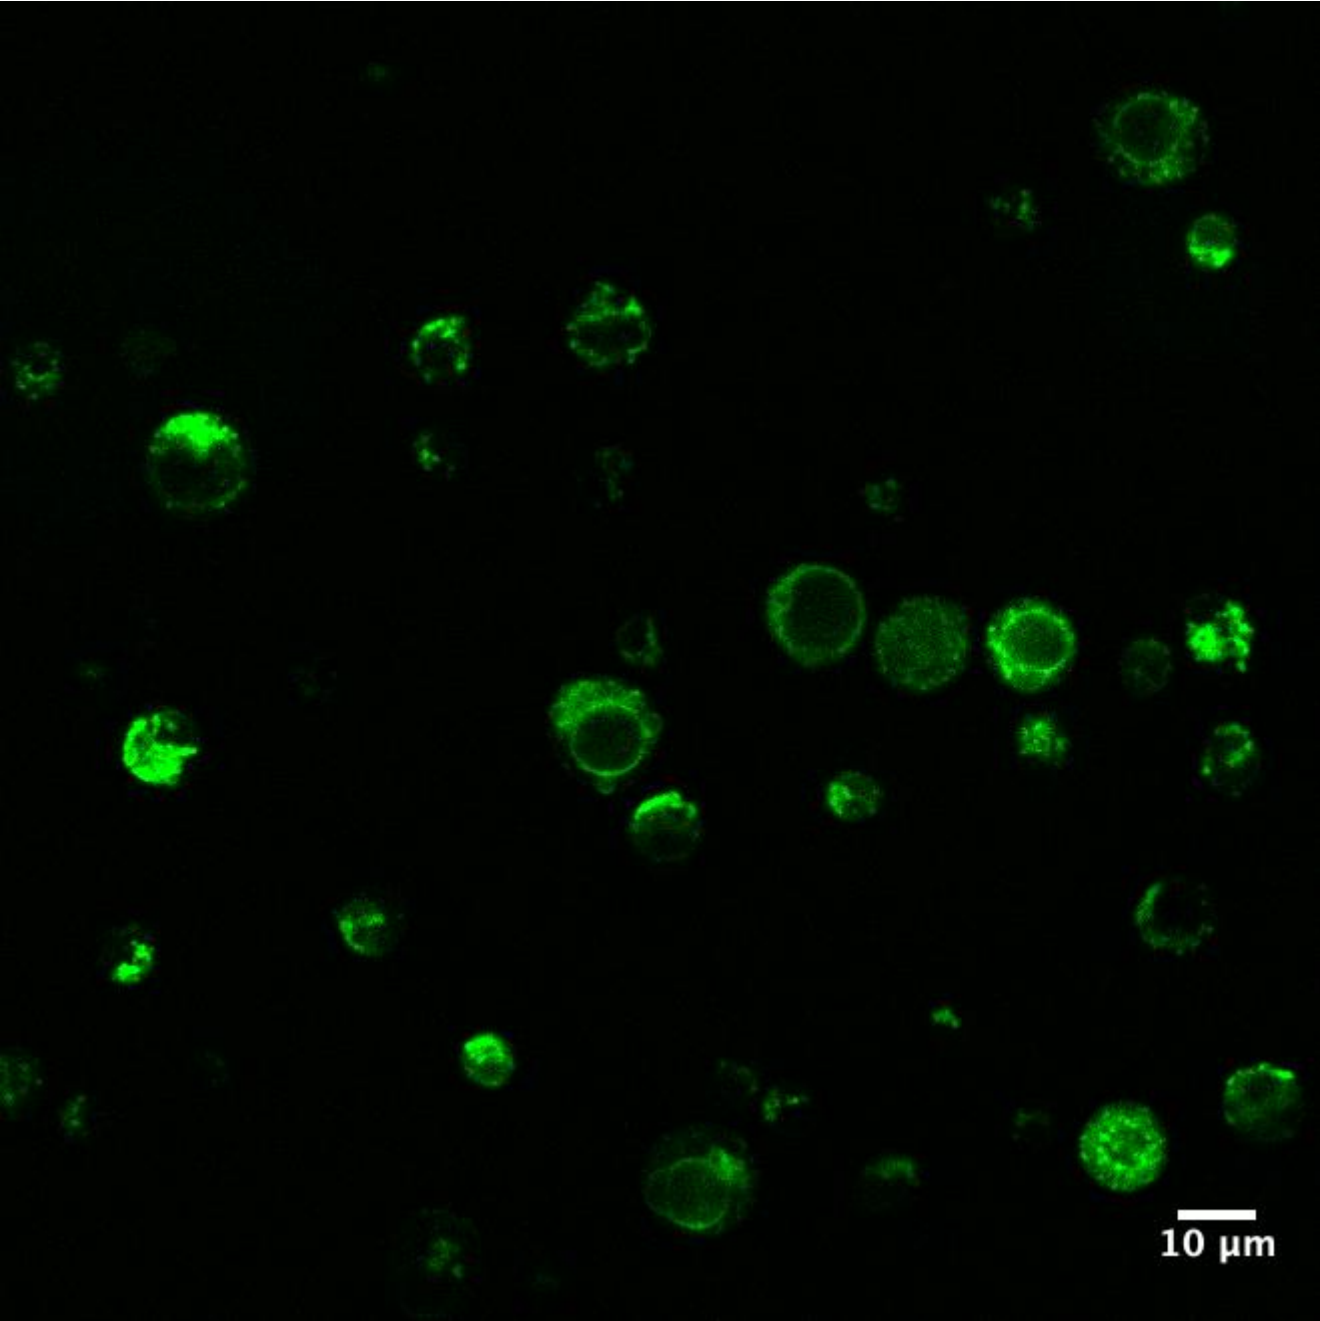

*CD8 NC*

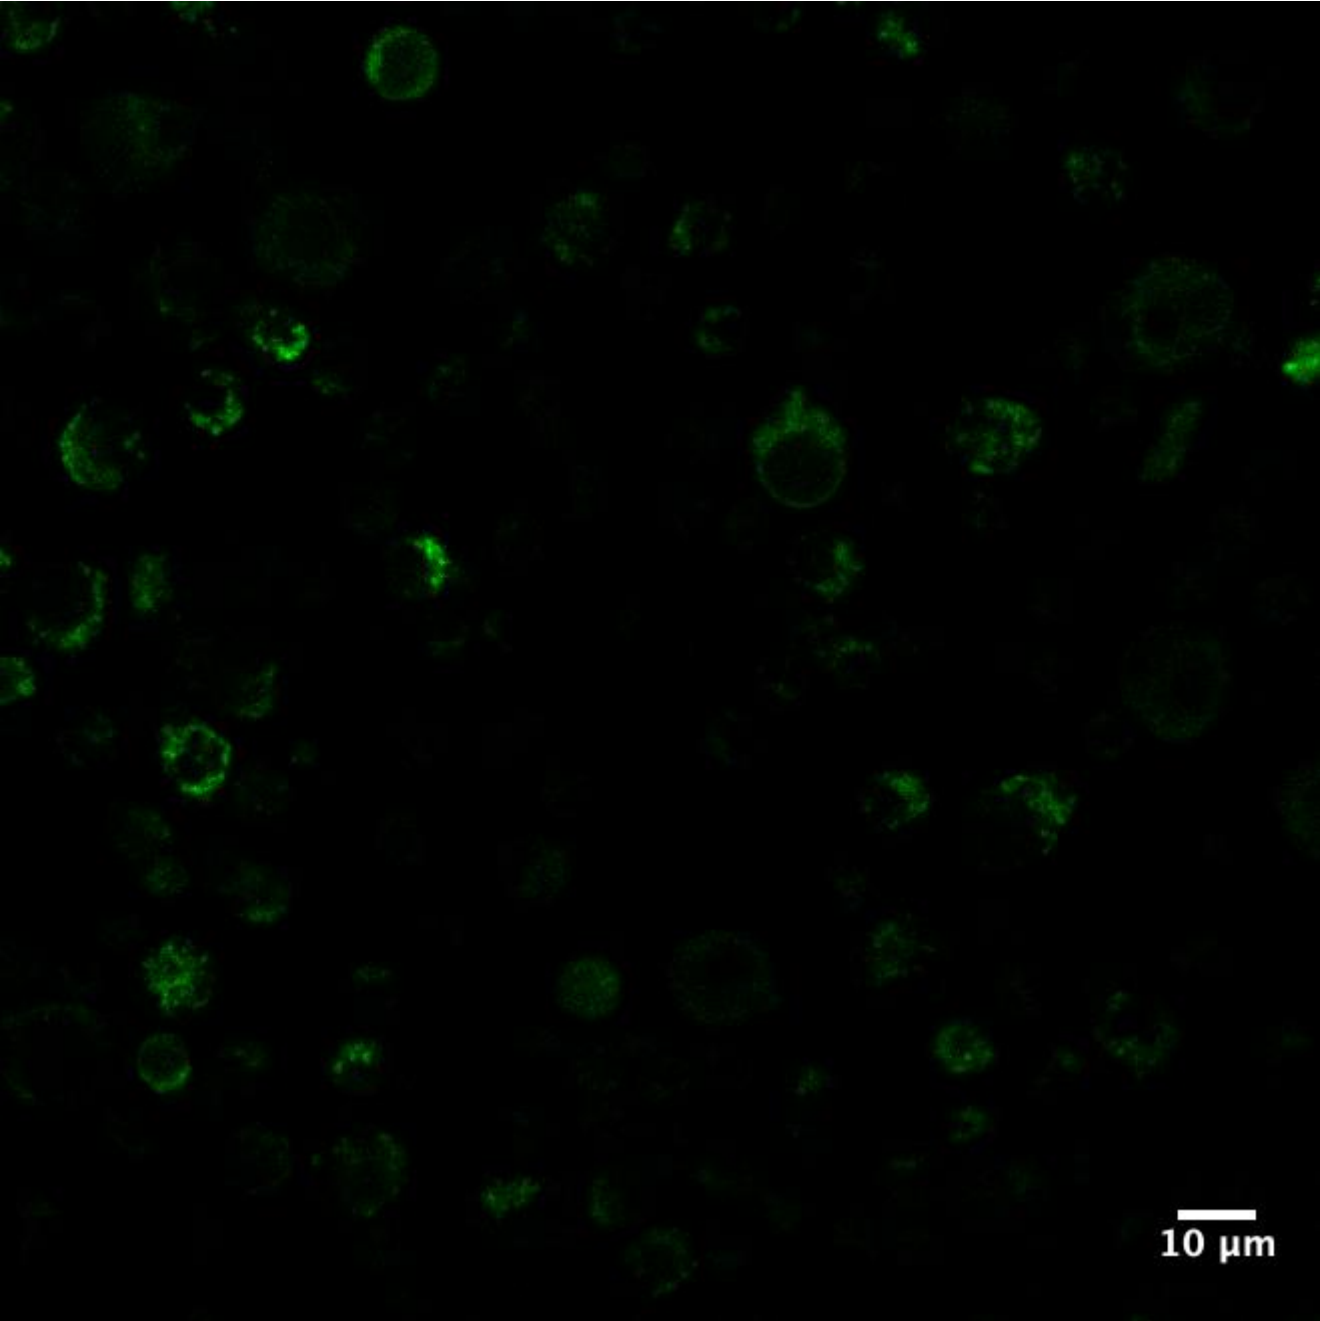

*CD8 BHB*

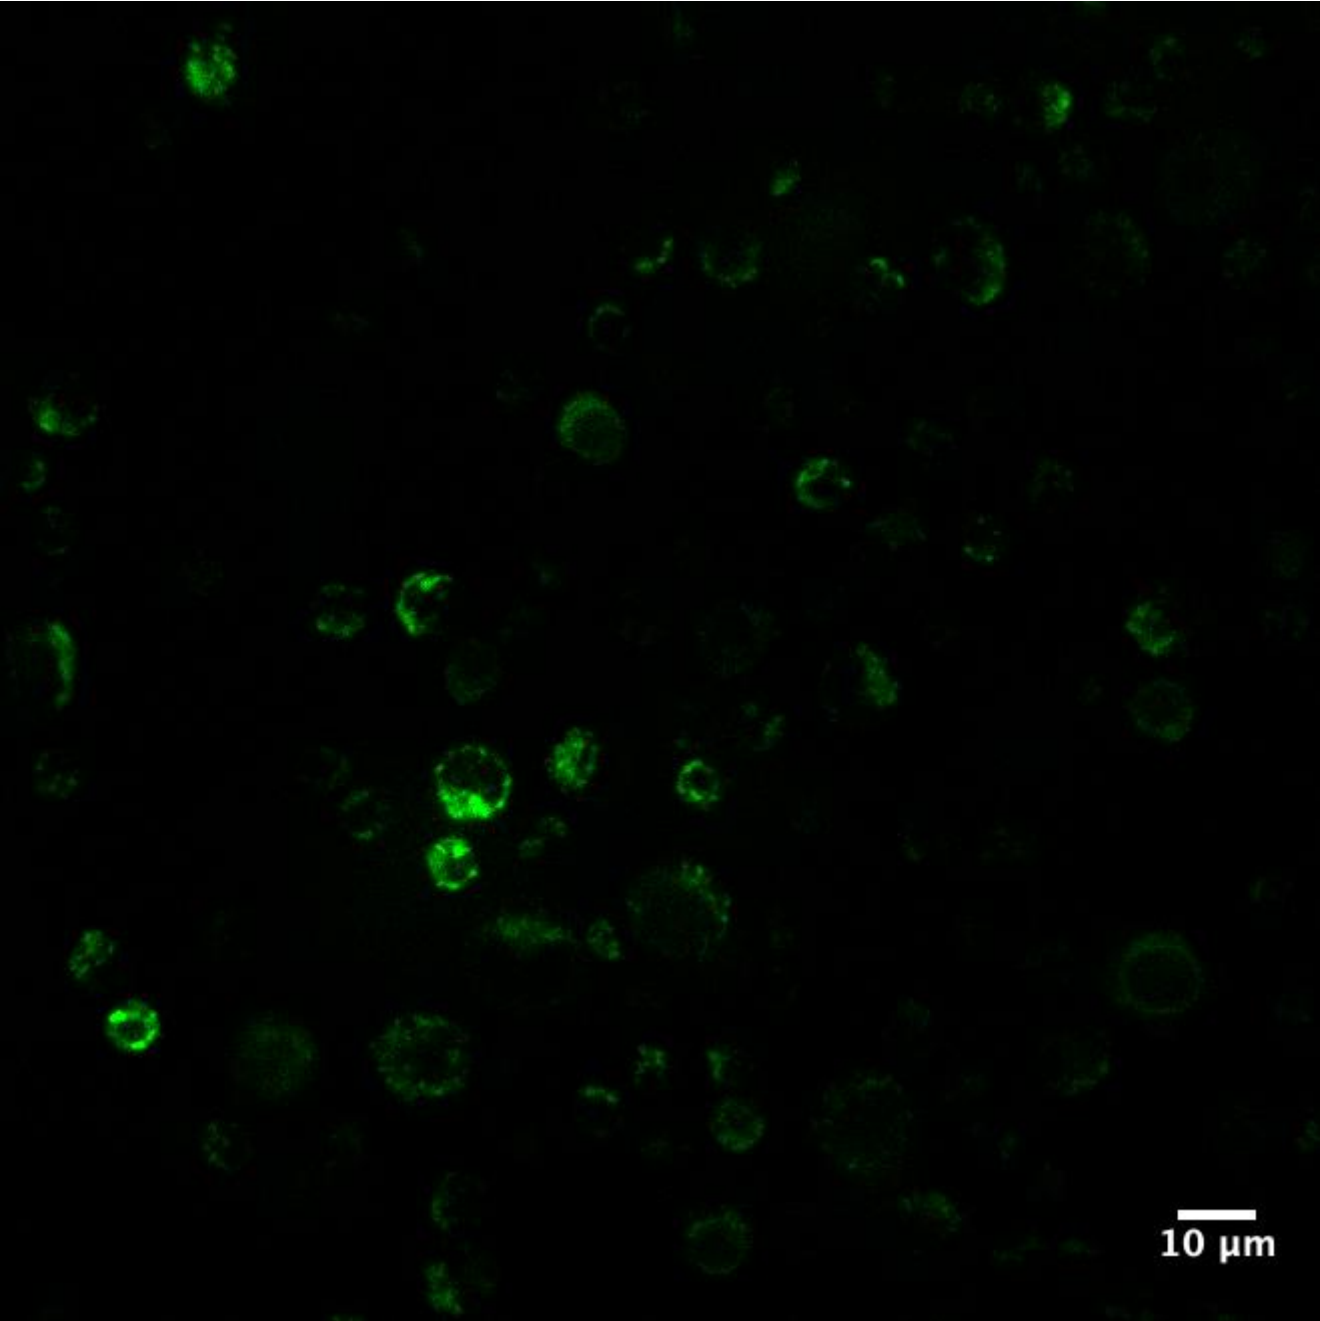

## Figure 3e Pan T (left panel)

*Overview and molecular weight marker*

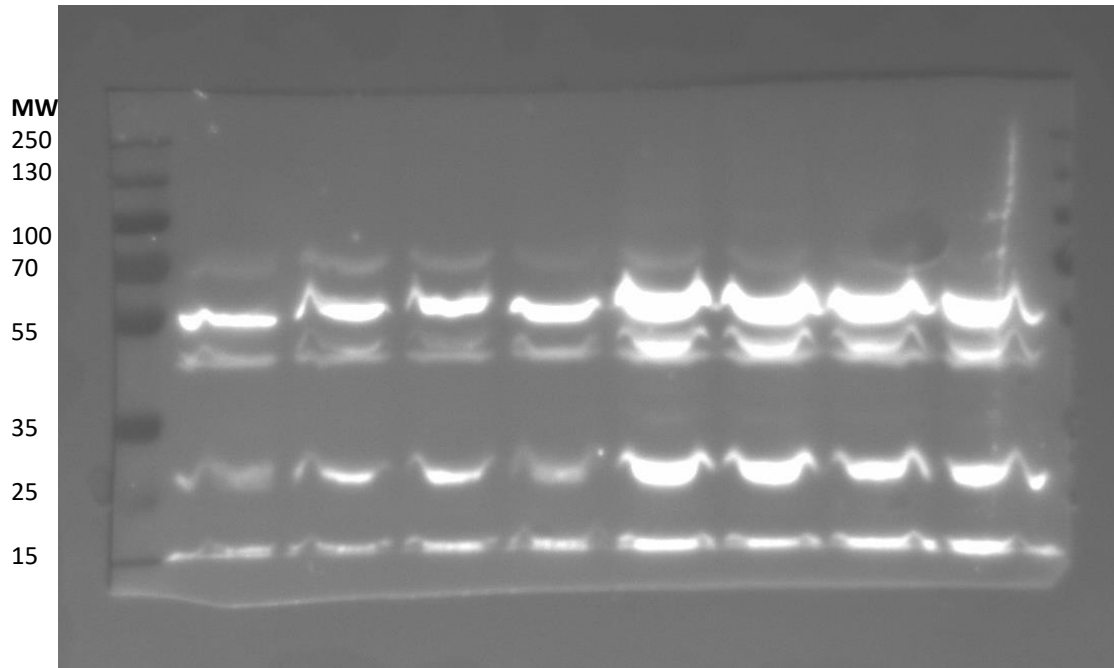

*Uncropped and unprocessed scans (OXPHOS + bActin)*

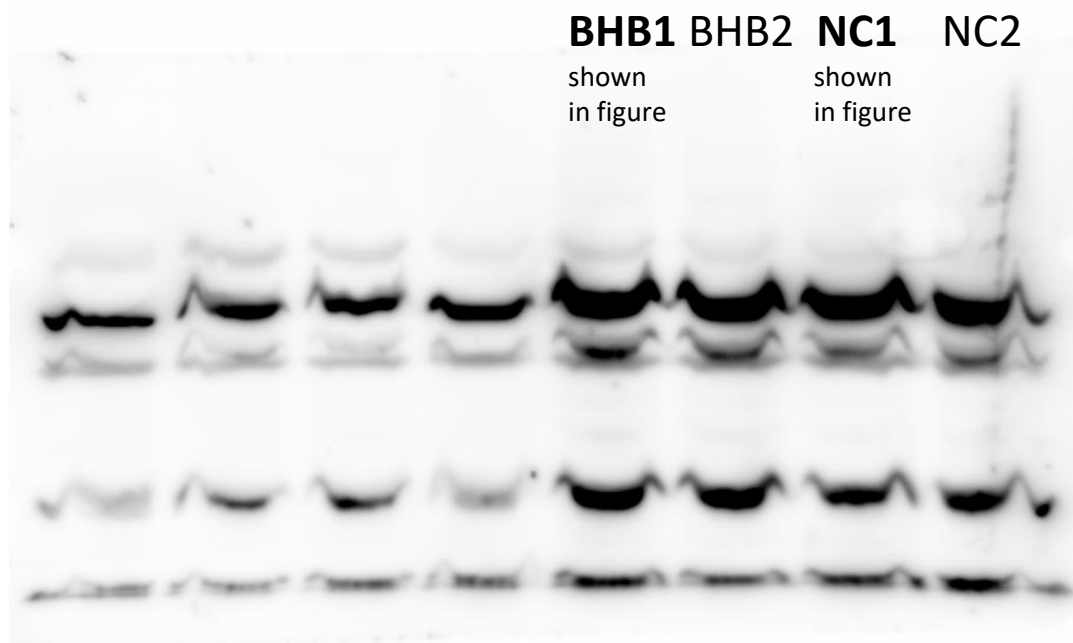

**Figure 3e Pan T (left panel)**

*Uncropped and unprocessed scans (bActin)*

**BHB1 BHB2 NC1 NC2**  
shown shown  
in figure in figure

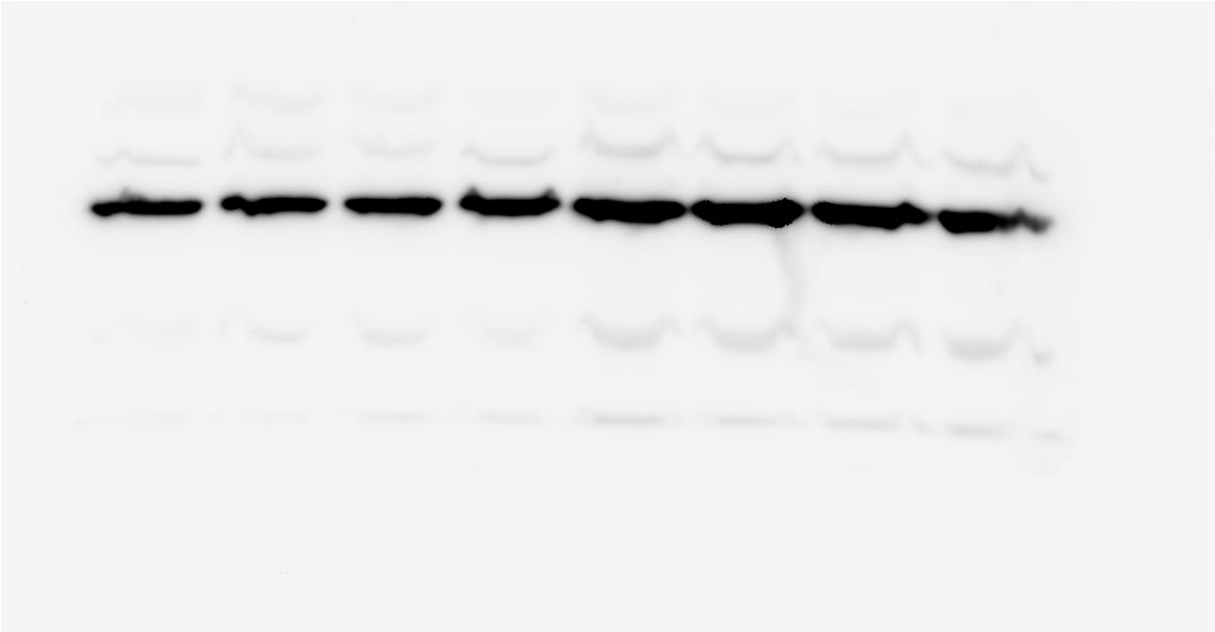

## Figure 3e CD4 (mid panel)

*Overview and molecular weight marker*

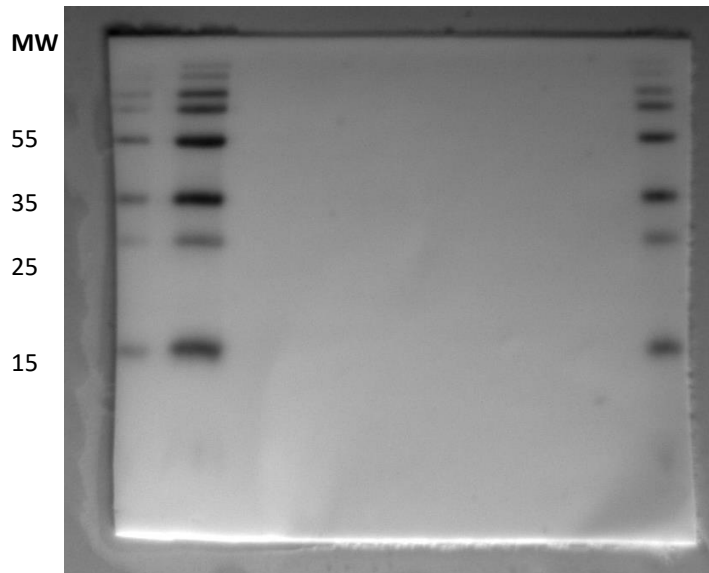

*Uncropped and unprocessed scans (OXPHOS + bActin)*

**NC BHB**

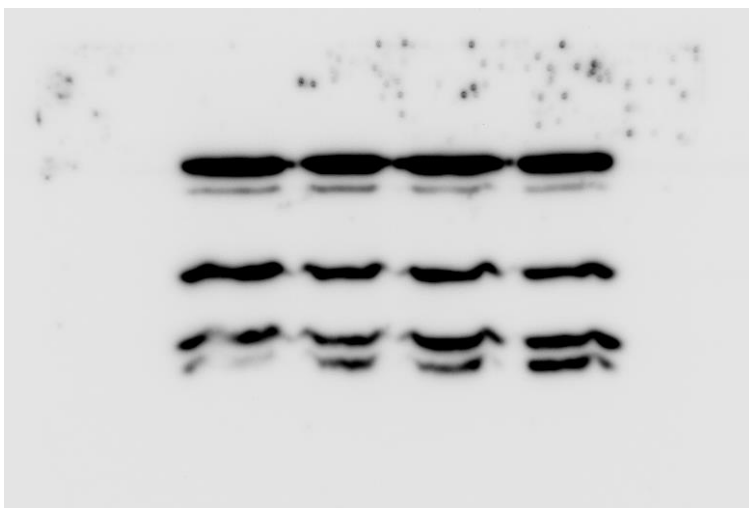

**NC BHB**

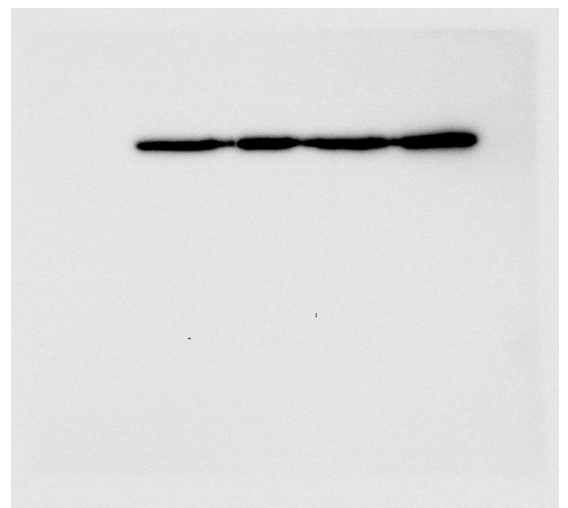

# Figure 3e CD8 (right panel)

*Overview and molecular weight marker*

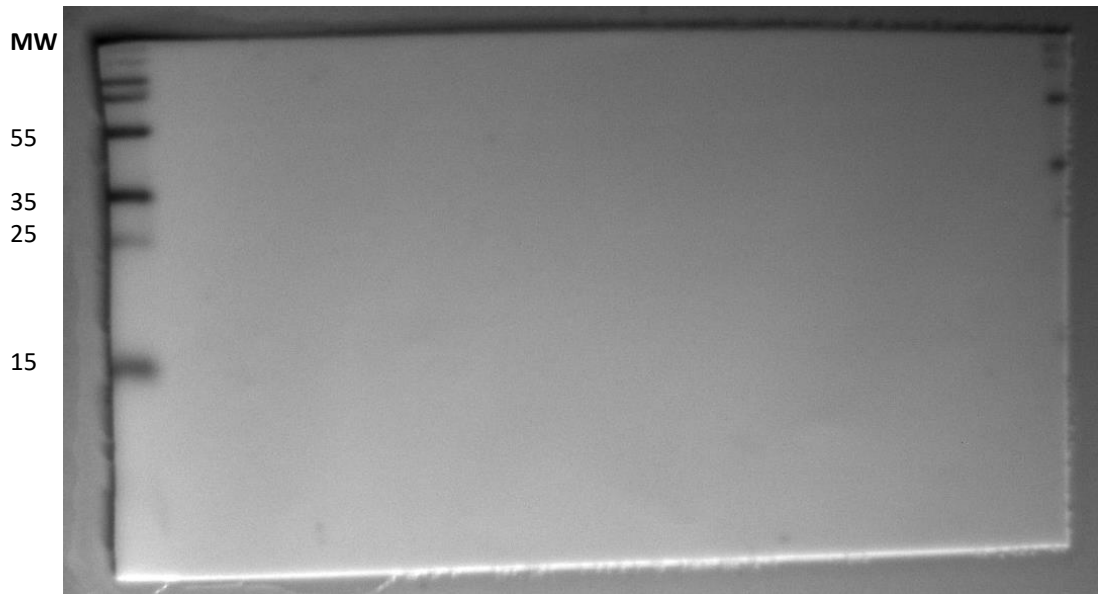

*Uncropped and unprocessed scans (OXPHOS + bActin)*

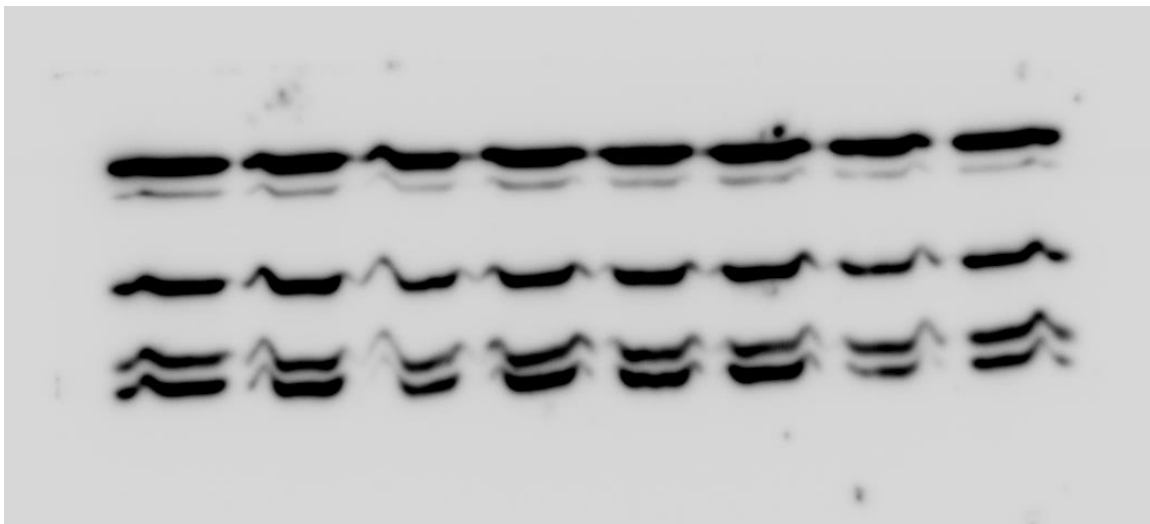

**NC BHB**

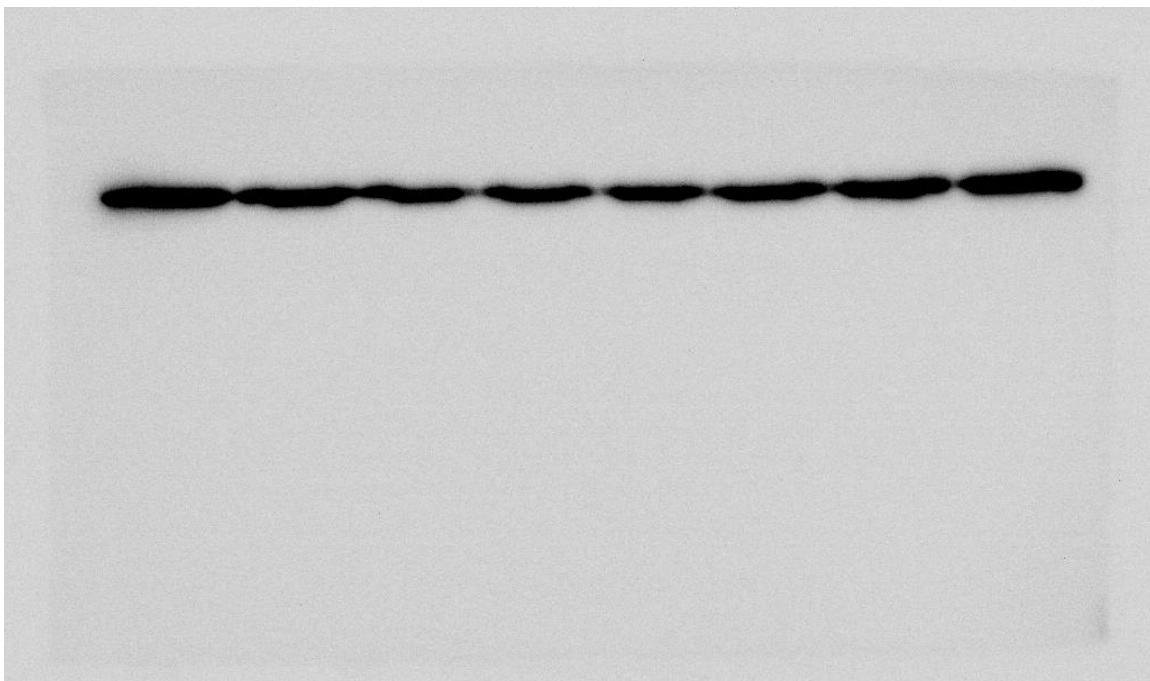

Supplement: EMMM-13-e14323-s004.pdf [file EMMM-13-e14323-s004.pdf]
