# Supplementary material for: Very‐low‐carbohydrate diet enhances human T‐cell immunity through immunometabolic reprogramming
Source: PubMed Central journal article supplement (PMC8350890; doi:10.15252/emmm.202114323), 2021-06-21
Supplement: EMMM-13-e14323-s001.pdf [file EMMM-13-e14323-s001.pdf]

## Expanded View Figures

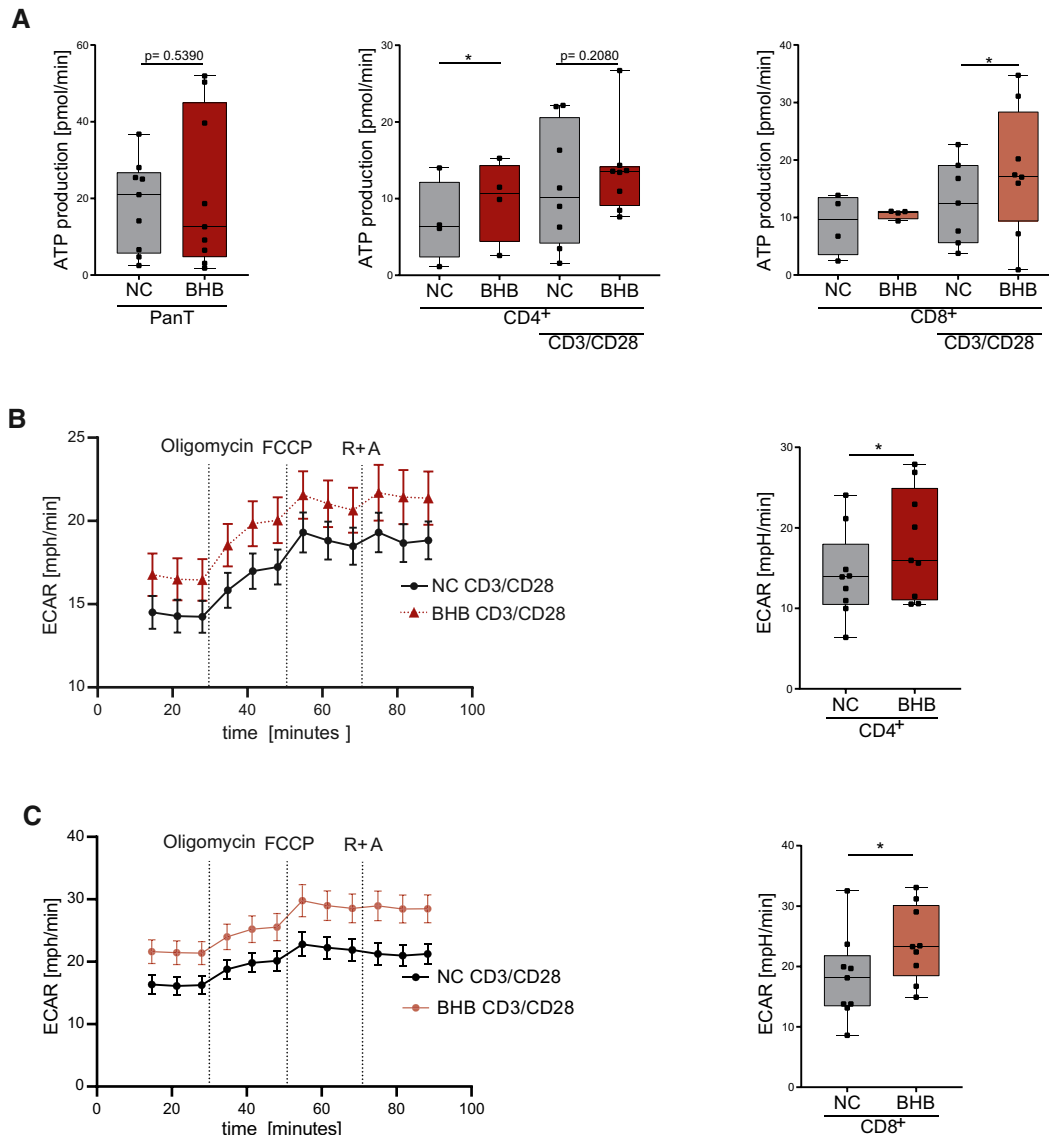

**Figure EV1. Ketone bodies shift T-cell metabolism to oxidative phosphorylation.**

Human PBMCs were cultivated for 48 h in RPMI containing 80 mg/dl glucose (NC) and supplemented with 10 mM beta-hydroxybutyrate (BHB). T-cell stimulation was performed through CD3/CD28 Dynabeads at a bead:cell ratio of 1:8. Pan T cells and CD4<sup>+</sup> and CD8<sup>+</sup> T cells were isolated through magnetic cell separation. Mitochondrial metabolism was analyzed for each subpopulation using a Seahorse XF96 Analyzer.

A Mitochondrial ATP production was measured in pan T cells, CD4<sup>+</sup> T cells, and CD8<sup>+</sup> T cells,  $n = 9$  (pan T) and  $n = 4/8$  (unstimulated/stimulated CD4 and CD8) individual experiments.

B, C Extracellular acidification rate, measured in (B) CD4<sup>+</sup> T cells and (C) CD8<sup>+</sup> T cells,  $n = 9$  biological replicates.

Data information: Data depicted as mean  $\pm$  SEM (ECAR) and box plots with median, 25<sup>th</sup> and 75<sup>th</sup> percentiles and range (all other). Dots indicating individual values.

\* $P < 0.05$  paired t-test/Wilcoxon matched-pairs signed rank test, as appropriate.

**Figure EV2. BHB does not increase ROS in unstimulated human T cells.**

Human peripheral blood mononuclear cells (PBMCs) were cultivated for 48 h in RPMI containing 80 mg/dl glucose (NC) and supplemented with 10 mM beta-hydroxybutyrate (BHB). Native T cells were analyzed via flow cytometry using the indicated dyes and antibodies identifying T cells and CD4<sup>+</sup>/CD8<sup>+</sup> T cell subsets.

- A Quantification of cellular ROS using CellROX, indicated by MFI FITC in human CD4<sup>+</sup>/CD8<sup>+</sup> T cells,  $n = 7/6$  biological replicates,  $P = 0.4917/0.6324$ .
- B Mitochondrial superoxide production quantified through MitoSOX staining, depicted as MFI PE in human pan/CD4<sup>+</sup>/CD8<sup>+</sup> T cells,  $n = 6/11/12$  biological replicates,  $P = 0.0938/0.3209/0.1401$ .
- C Representative gating strategy for memory cell quantification using flow cytometry.
- D–F Representative histogram plots for quantification of (D) cellular ROS using CellROXgreen, (E) mitochondrial mass using MitoTracker green and (F) mitochondrial ROS using MitoSOXred.
- G Densitometric analysis of Western blots of mitochondrial oxidative phosphorylation proteins in pan/CD4<sup>+</sup>/CD8<sup>+</sup> T cells as indicated,  $n = 3/4/4$  (CD4 complex IV,  $n = 3$ ) biological replicates.

Data information: Data depicted as box plots with median, 25<sup>th</sup> and 75<sup>th</sup> percentiles and range, crosses indicating mean, dots indicating individual values. \* $P < 0.05$ , \*\* $P < 0.01$ , paired t-test/Wilcoxon matched-pairs signed rank test, as appropriate.

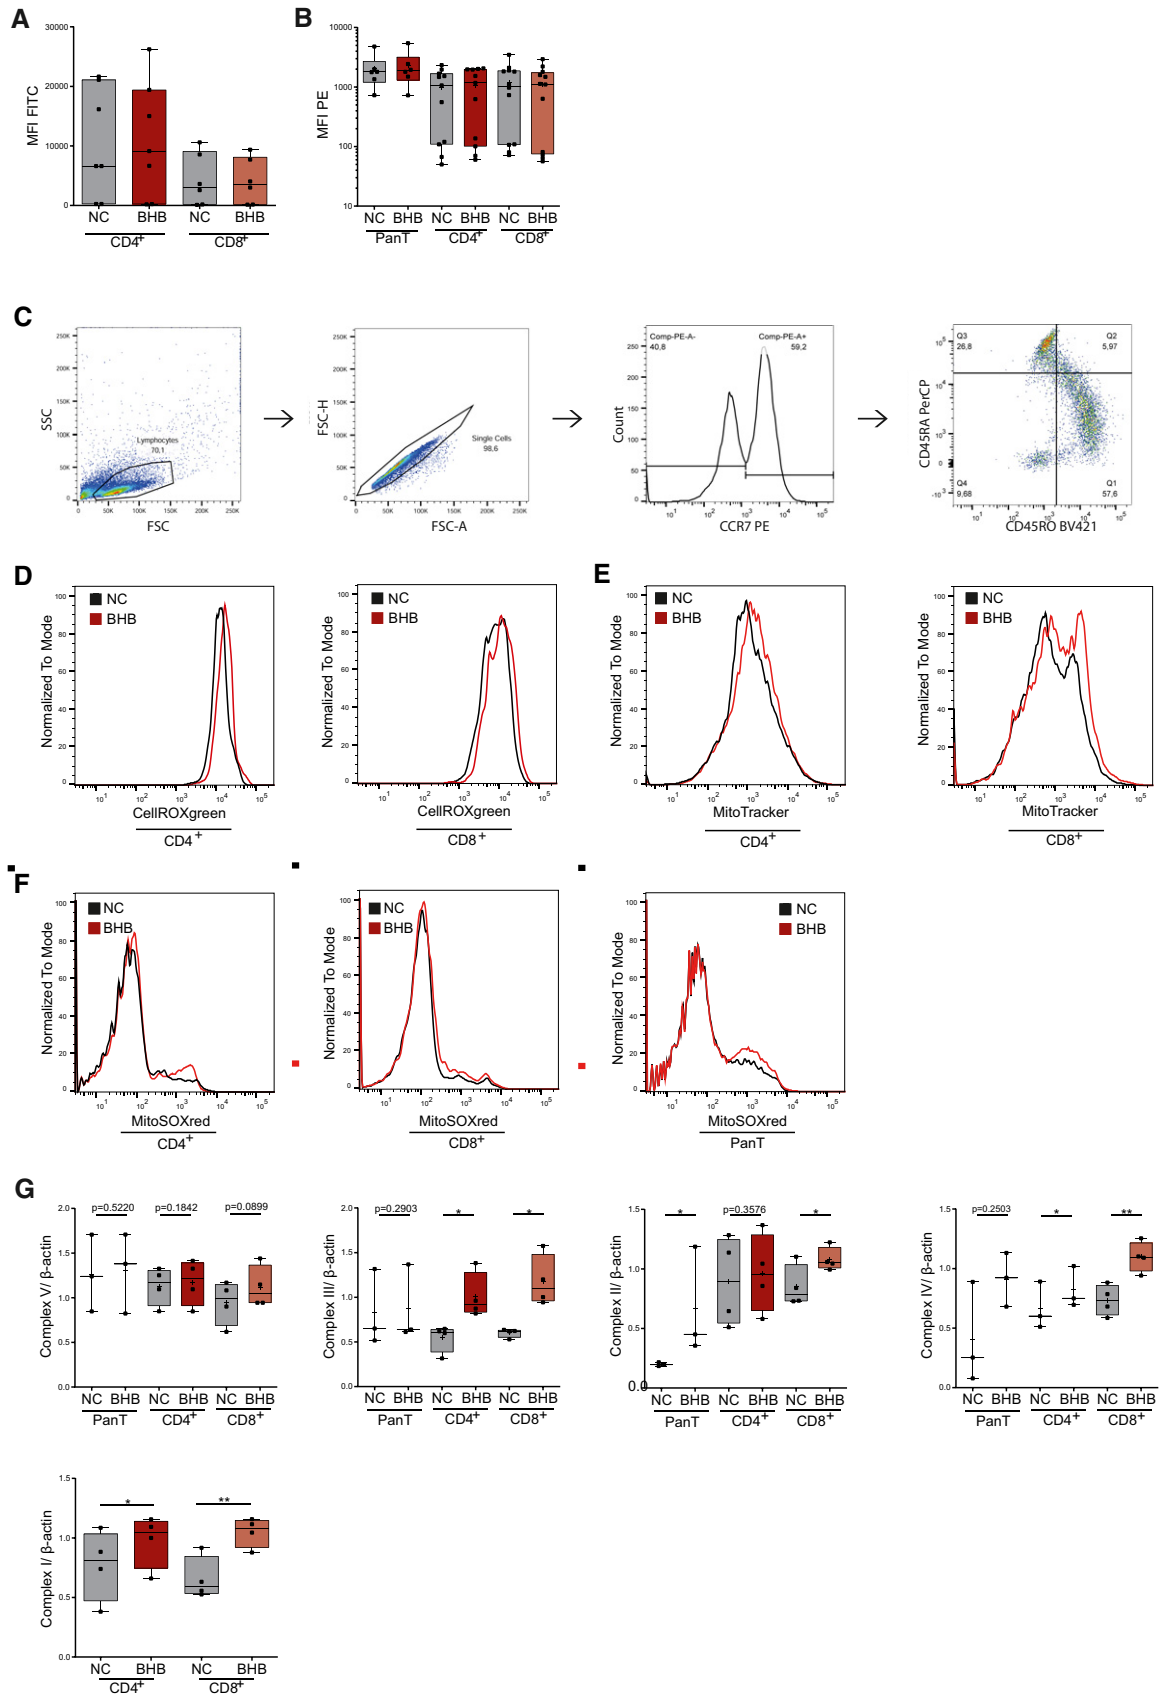

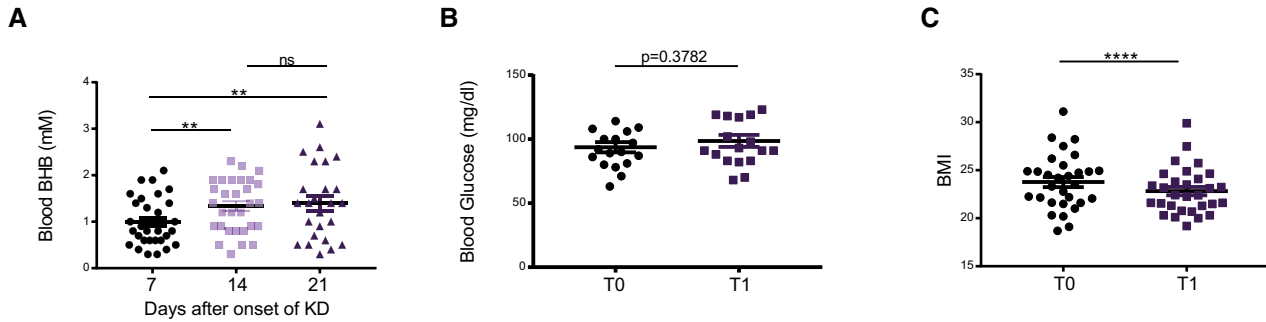

### Figure EV3. Ketogenic diet *in vivo*.

Healthy volunteers conducted a 3-week ketogenic diet (KD) with limited carbohydrate consumption of < 30 g/day.

- A Blood BHB concentration of healthy volunteers at the indicated time points as measured by point of care instruments.  
 B Blood glucose concentration of healthy volunteers was analyzed prior to starting the diet (T<sub>0</sub>) and again after 3 weeks of strict adherence to the diet (T<sub>1</sub>).  
 C Participants' BMI measured at the start and at the end of KD.

Data information: Data depicted as mean ± SEM, dots indicating individual values. <sup>ns</sup>P > 0.05, \*\*P < 0.01, \*\*\*\*P < 0.0001, paired t-test/Wilcoxon matched-pairs signed rank test, as appropriate.

### Figure EV4. Ketogenic diet primes human T cells to mitochondrial metabolism and memory cell development *in vivo*.

Forty-four healthy volunteers conducted a 3-week KD with a limited carbohydrate consumption of < 30 g/day. Blood was taken and analyzed prior to starting the diet (T<sub>0</sub>) and again after 3 weeks of strict adherence to the diet (T<sub>1</sub>). PBMCs were isolated. If applicable, T-cell stimulation was performed through CD3/CD28 Dynabeads at a bead:cell ratio of 1:8. Pan/CD4<sup>+</sup>/CD8<sup>+</sup> T cells were separated via magnetic cell labeling. Mitochondrial metabolism was analyzed for each subpopulation using a Seahorse XF96 Analyzer.

- A Mitochondrial ATP production was measured in stimulated CD4<sup>+</sup> and CD8<sup>+</sup> T cells, n = 14 individual human subjects.  
 B–E Extracellular acidification rate, measured in (B) unstimulated and (C) stimulated CD4<sup>+</sup> T cells and (D) unstimulated and (E) stimulated CD8<sup>+</sup> T cells, n = 6 individual human subjects.  
 F, G Glycolytic proton efflux rate (glycoPER) and compensatory (maximum) glycoPER measured in stimulated (F) CD4<sup>+</sup> T cells and (G) CD8<sup>+</sup> T cells, depicted as mean ± 95% CI/mean ± SEM, n = 7/8 individual human subjects.  
 H Quantification of mitochondrial membrane potential using JC1, indicated by MFI PE/FITC in human lymphocytes *in vivo*. n = 4/5 (unstimulated/stimulated) individual human subjects.  
 I, J Quantification of (I) cellular and (J) mitochondrial ROS using CellROX/MitoSOX, indicated by MFI FITC and MFI PE in native human Pan/CD4<sup>+</sup>/CD8<sup>+</sup> T cells, n = 8 (CellROX), 10/9/10 (MitoSOX) individual human subjects.  
 K Quantification of mitochondrial mass using MitoTracker green, indicated by MFI FITC in native human pan/CD4<sup>+</sup>/CD8<sup>+</sup> T cells, n = 10/10/11 individual human subjects.  
 L TruCulture Interleukin (IL)1α/β protein quantification of LPS-stimulated whole blood samples, n = 11/12 individual human subjects.  
 M TruCulture IL8 and IL12 subunit p40 protein quantification of unstimulated whole blood samples, n = 5 (IL8: T0 n = 4) individual human subjects. TruCulture IFNγ, IL4, IL6, IL23, and TNFα protein quantification of unstimulated whole blood samples were below the lower limit of quantification.

Data information: Data depicted as mean ± SEM (ECAR/glycoPER) and box plots (all other) with median, 25<sup>th</sup> and 75<sup>th</sup> percentiles and range, dots indicating individual values. \*P < 0.05, \*\*P < 0.01, paired t-test/Wilcoxon matched-pairs signed rank test, as appropriate.

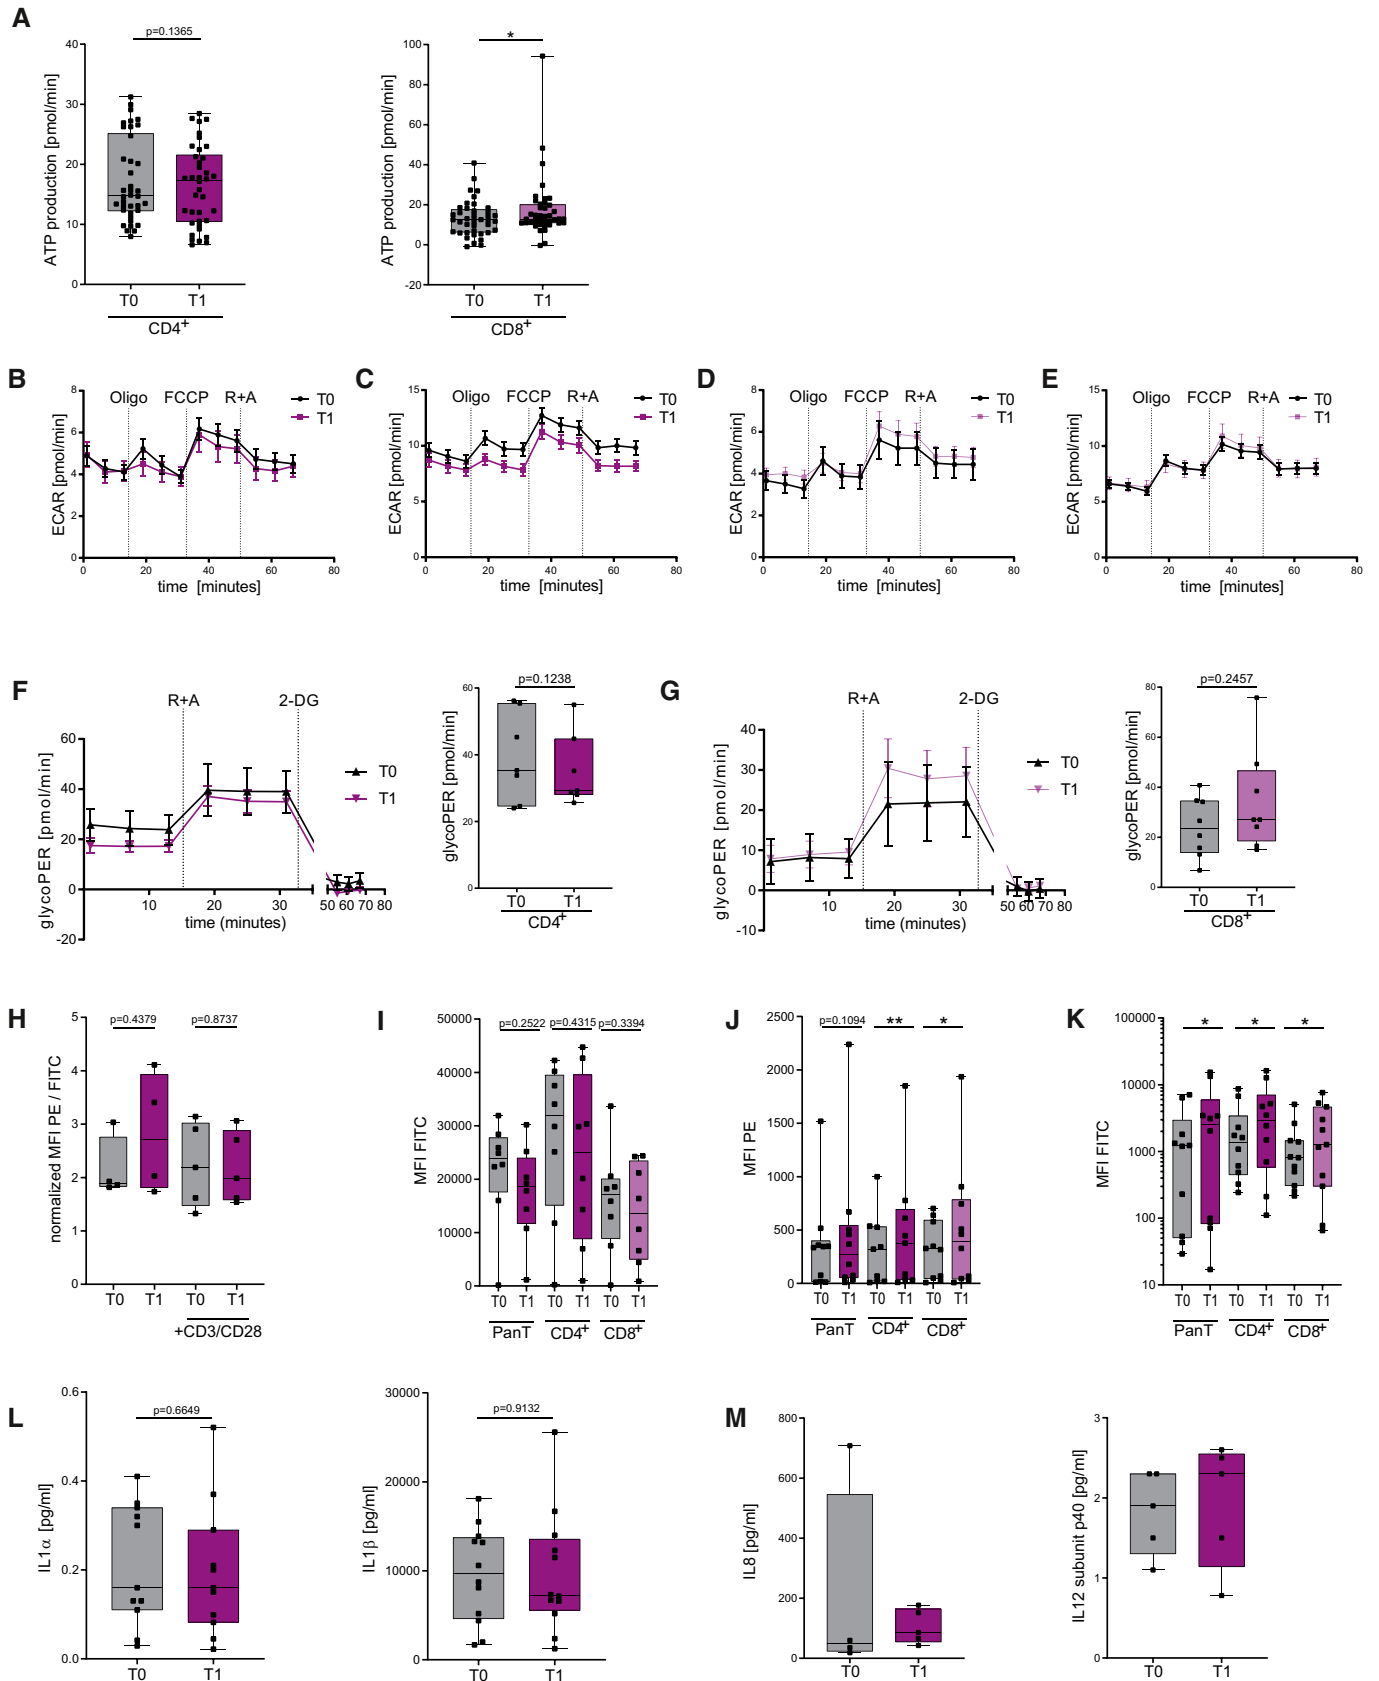

Figure EV4.
