# Supplementary material for: Very‐low‐carbohydrate diet enhances human T‐cell immunity through immunometabolic reprogramming
Source: PubMed Central journal article supplement (PMC8350890; doi:10.15252/emmm.202114323), 2021-06-21

## Source Data – FIGURE 6

### Figure 6e

*Overview and molecular weight marker*

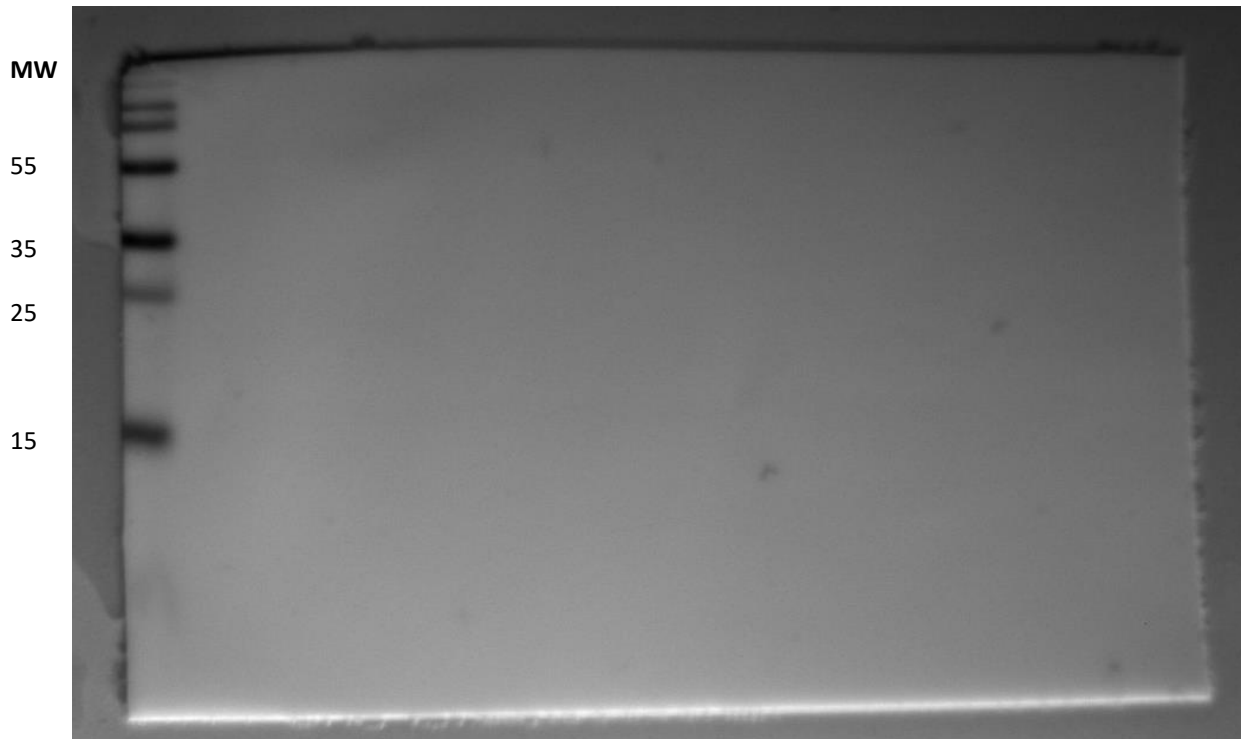

*Uncropped and unprocessed scans (OXPHOS)*

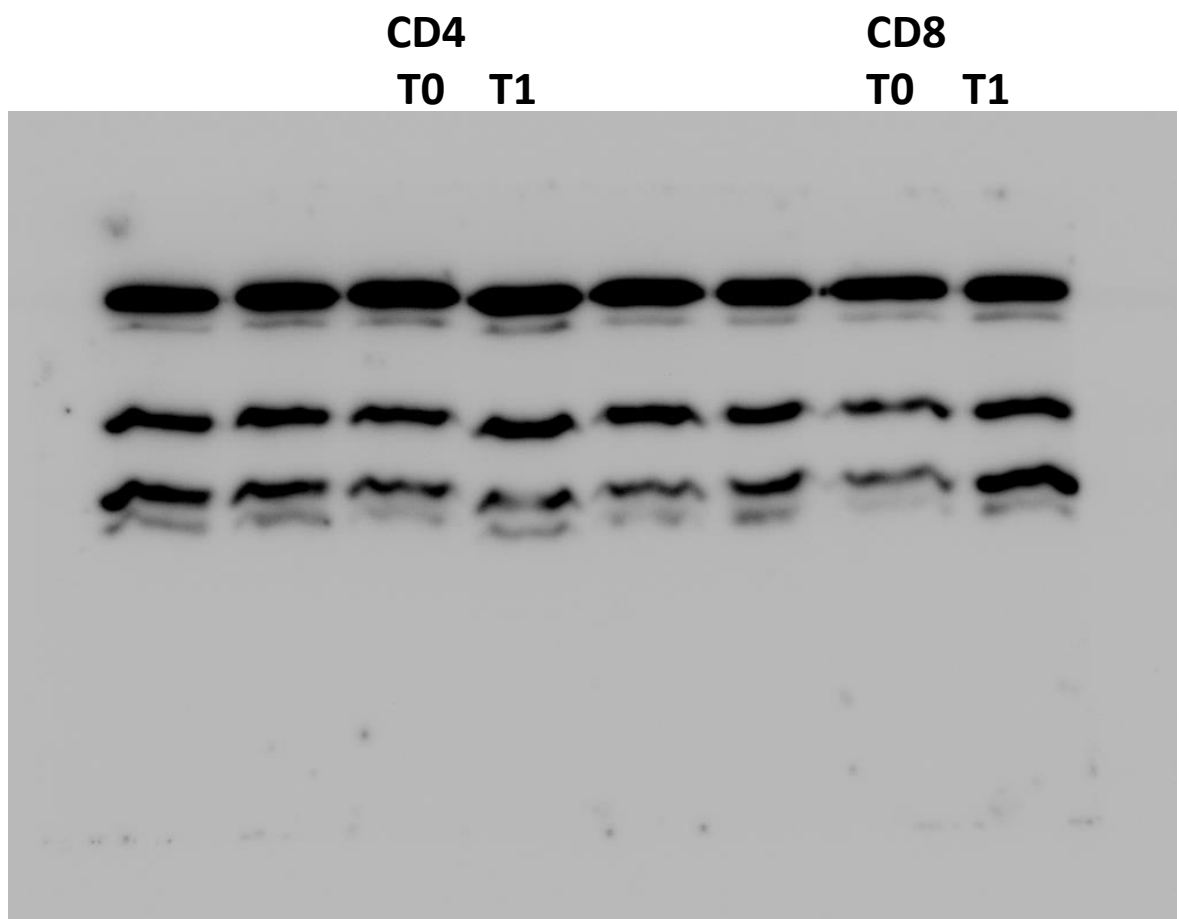

# Figure 6e

*Uncropped and unprocessed scans (bActin)*

| CD4 |    | CD8 |    |
|-----|----|-----|----|
| T0  | T1 | T0  | T1 |

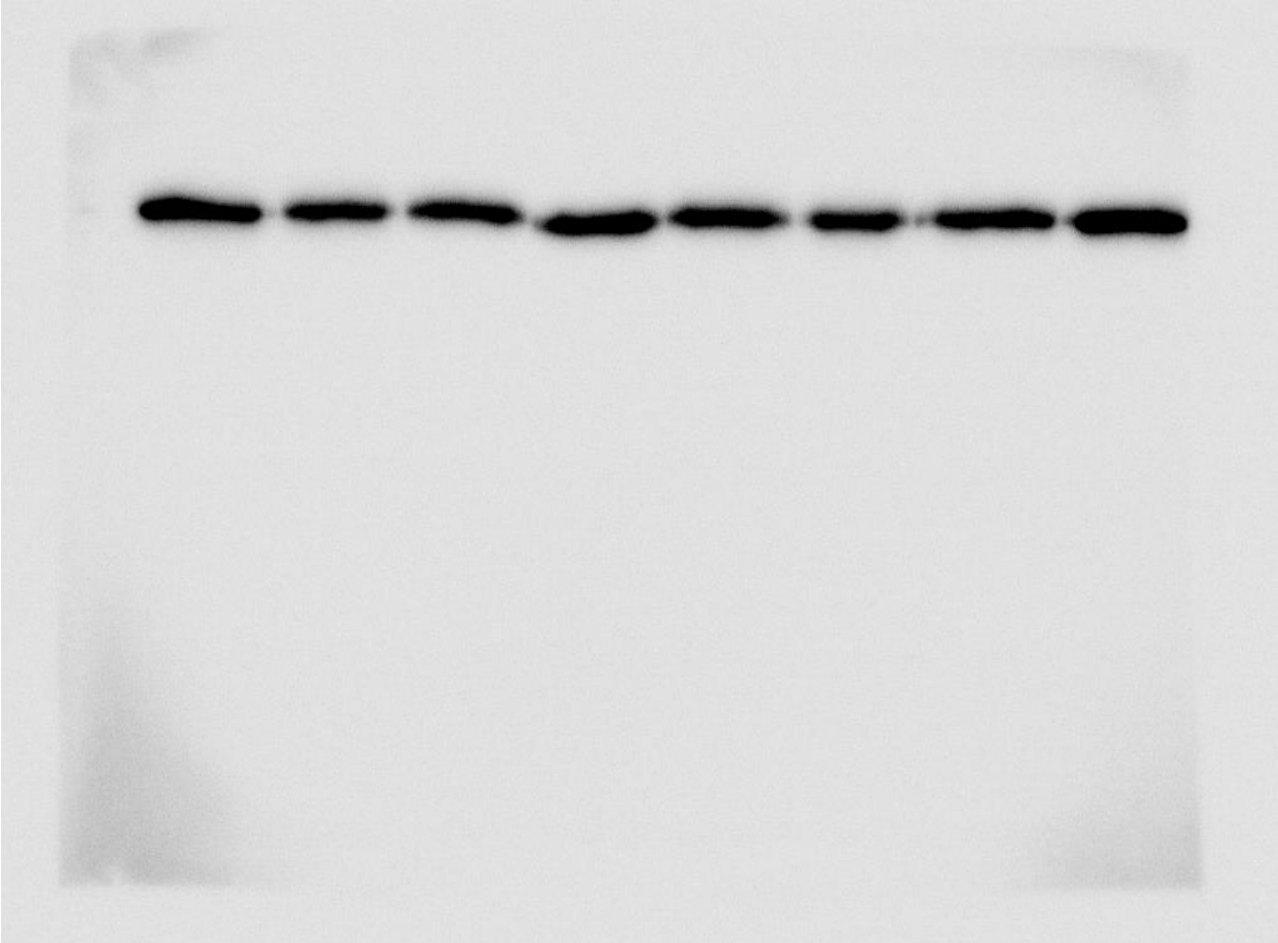

# Figure 6f unprocessed images

*CD4 T0*

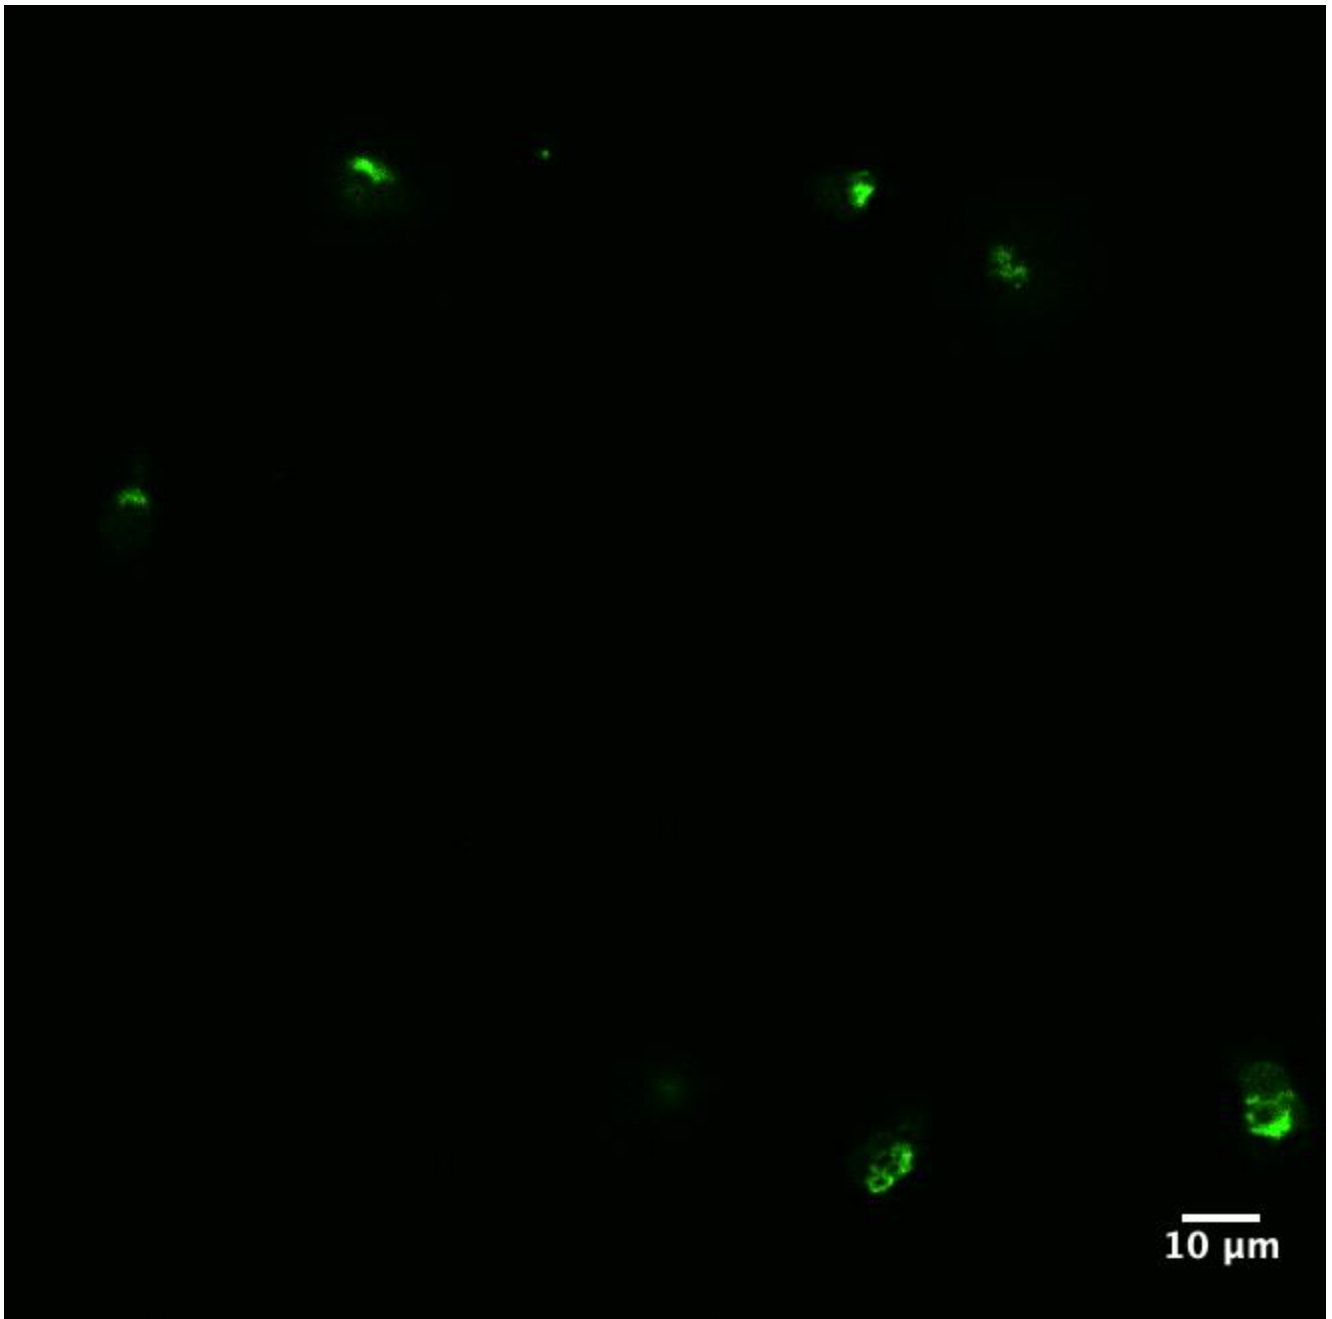

CD4 T1

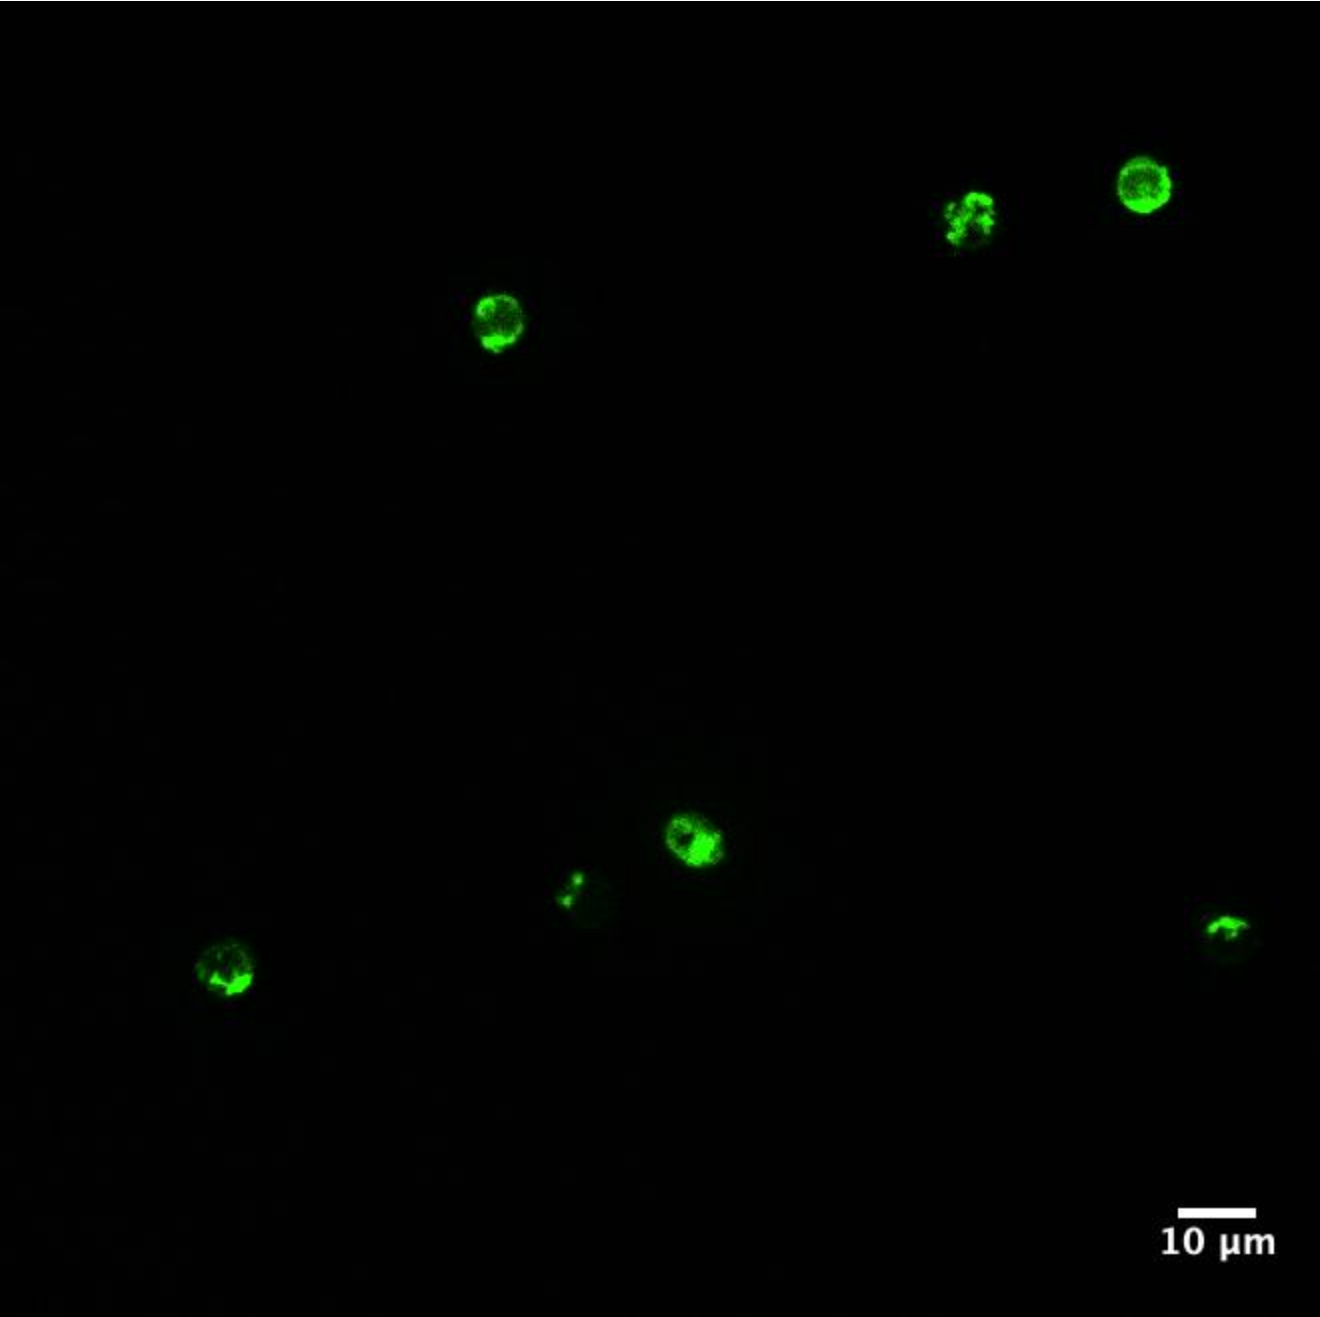

*CD8 T0*

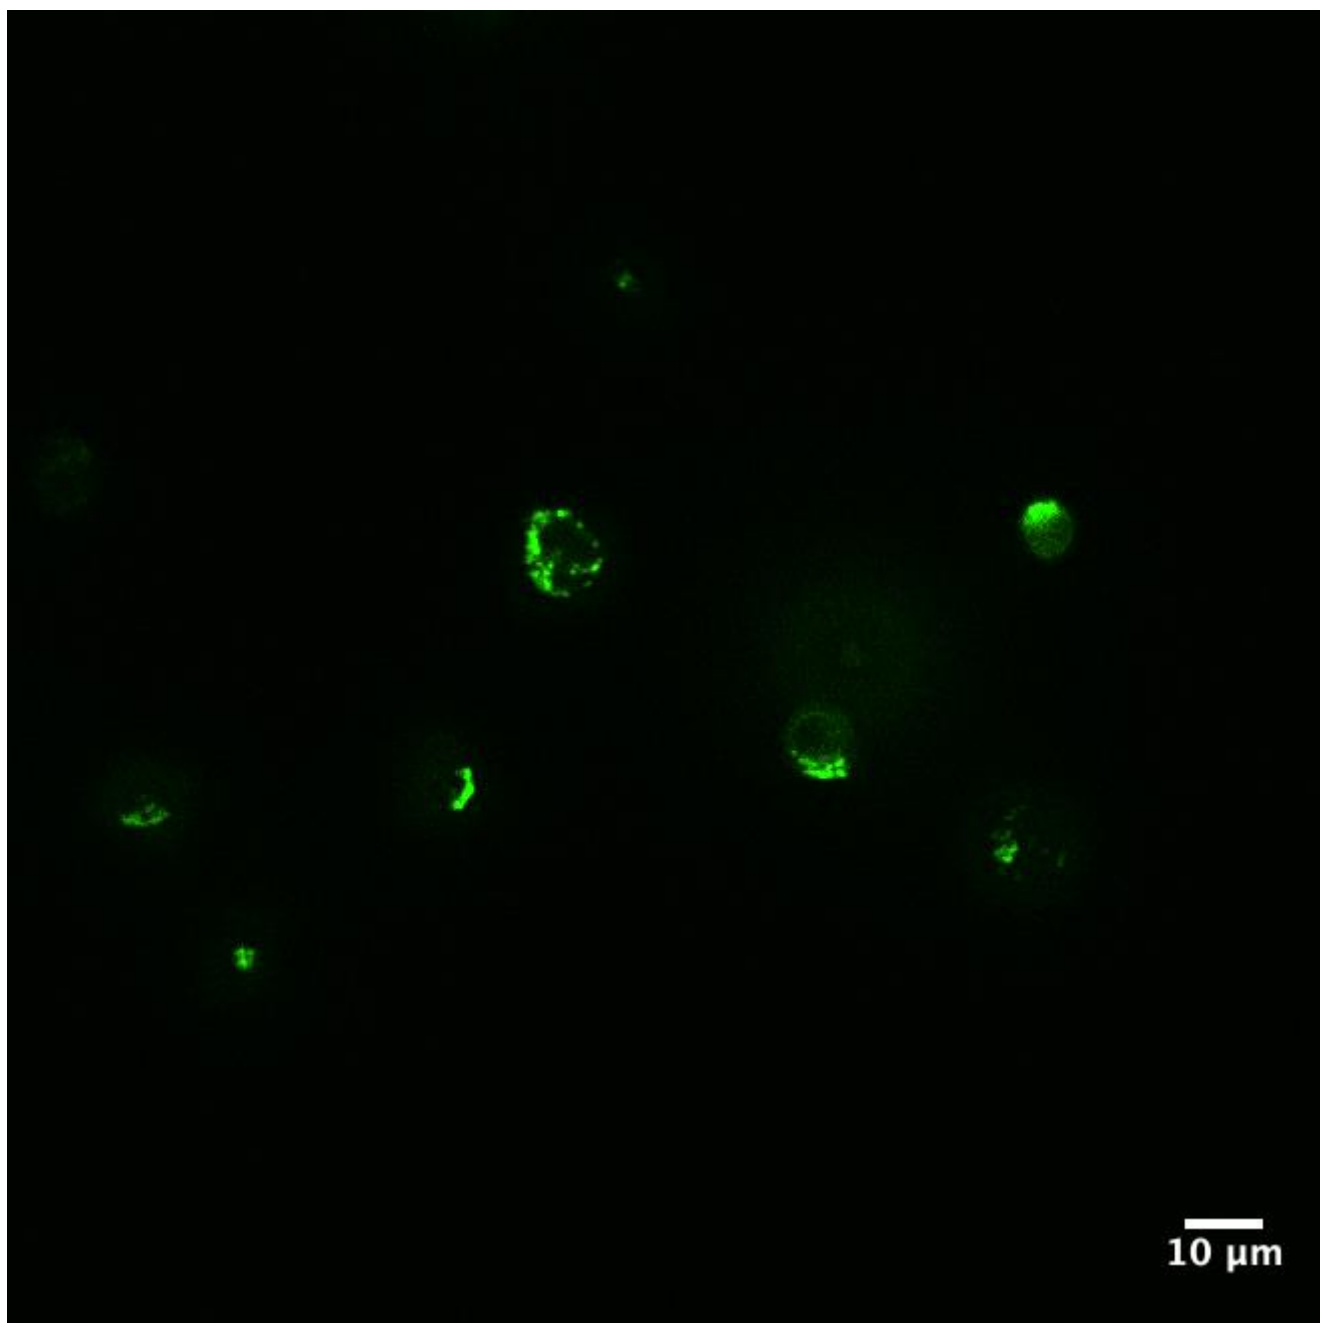

CD8 T1

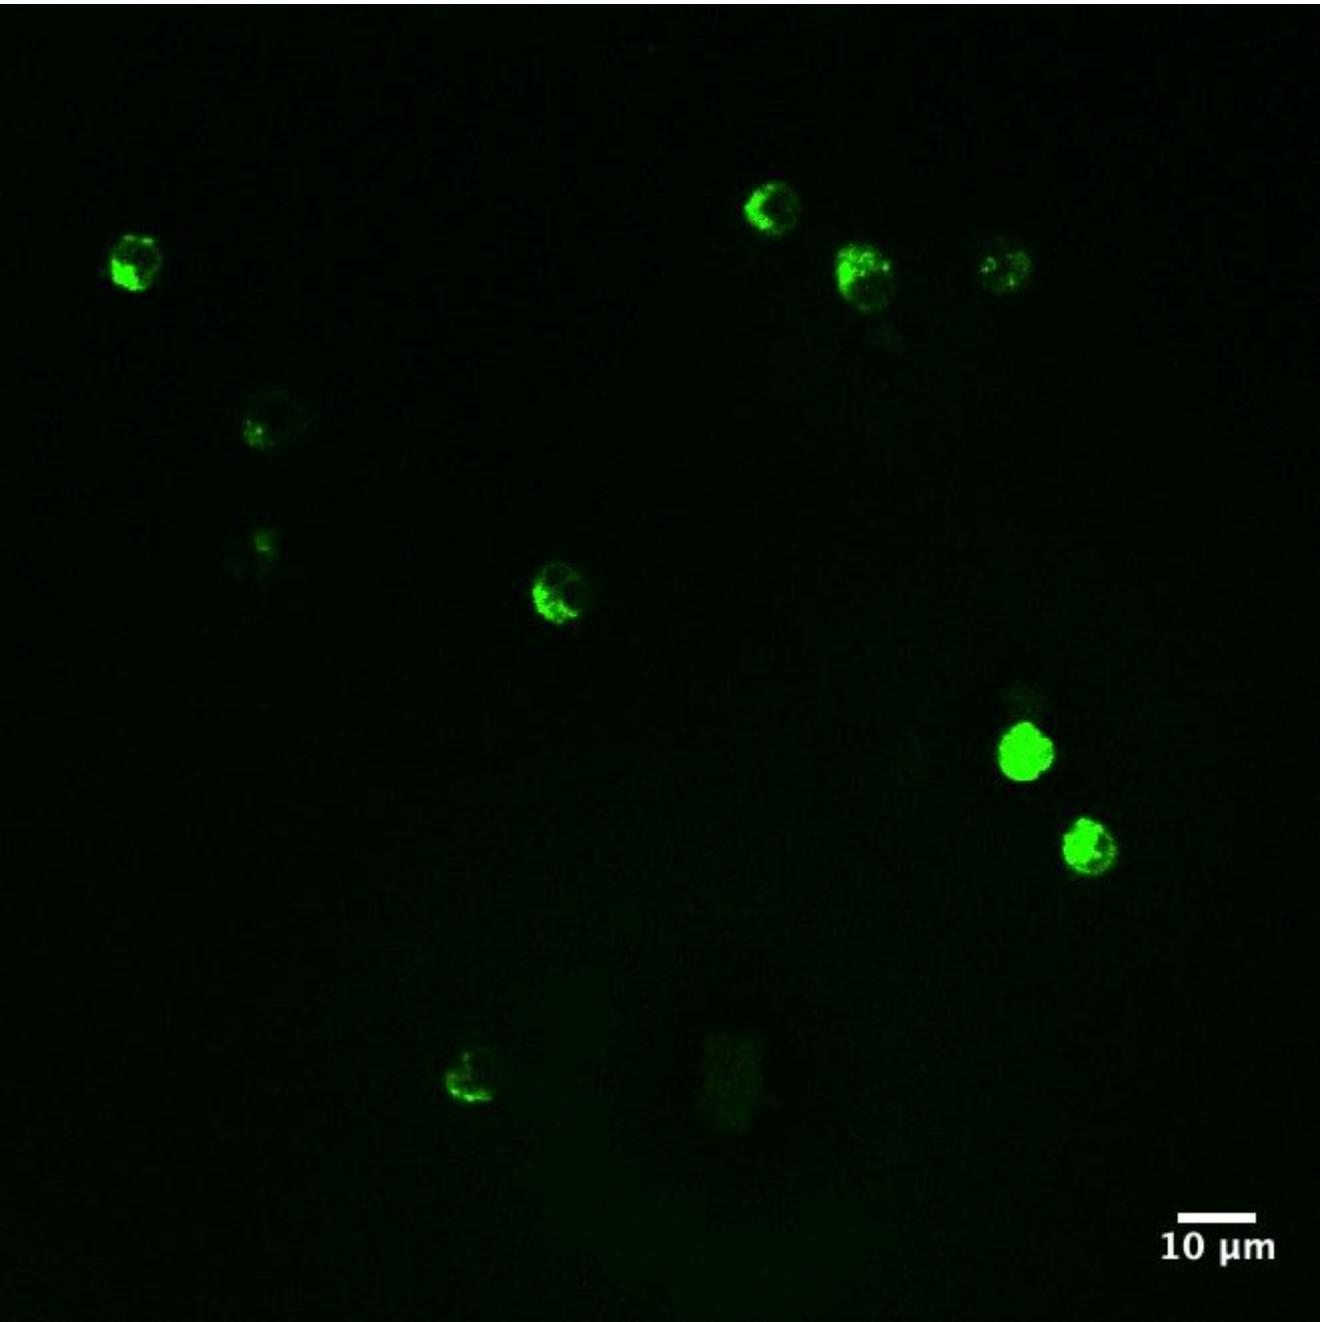

Supplement: EMMM-13-e14323-s002.pdf [file EMMM-13-e14323-s002.pdf]
