# Supplementary material for: Very‐low‐carbohydrate diet enhances human T‐cell immunity through immunometabolic reprogramming
Source: PubMed Central journal article supplement (PMC8350890; doi:10.15252/emmm.202114323), 2021-06-21
Supplement: EMMM-13-e14323-s005.pdf [file EMMM-13-e14323-s005.pdf]

# Appendix

## Very Low Carbohydrate Diet Enhances Human T Cell Immunity through Immunometabolic Reprogramming

**Simon Hirschberger<sup>1,2,†</sup>, Gabriele Strauß<sup>1,2,†</sup>, David Effinger<sup>1,2</sup>, Xaver Marstaller<sup>1</sup>, Alicia Ferstl<sup>1</sup>, Martin Bernhard Müller<sup>1,2</sup>, Tingting Wu<sup>1</sup>, Max Hübner<sup>1,2</sup>, Tim Rahmel<sup>3</sup>, Hannah Mascolo<sup>1</sup>, Nicole Exner<sup>4</sup>, Julia Heß<sup>5,6</sup>, Friedrich Wilhelm Kreth<sup>1</sup>, Kristian Unger<sup>5,6</sup>, Simone Kreth<sup>1,2,\*</sup>**

† These authors contributed equally.

**1** Walter Brendel Center of Experimental Medicine, Ludwig-Maximilian-University München (LMU), Munich, 81377, Germany.

**2** Department of Anaesthesiology and Intensive Care Medicine, Research Unit Molecular Medicine, LMU University Hospital, Ludwig-Maximilian-University München (LMU), Munich, 81377, Germany.

**3** Department of Anesthesia, Intensive Care Medicine and Pain Therapy, University Hospital Knappschaftskrankenhaus Bochum, Bochum, 44892, Germany.

**4** Chair of Metabolic Biochemistry, Biomedical Center (BMC), Faculty of Medicine, Ludwig-Maximilian-University München (LMU), Munich, 81377, Germany.

**5** Helmholtz Center Munich, Research Unit Radiation Cytogenetics, Neuherberg, 85764, Germany.

**6** Department of Radiation Oncology, LMU University Hospital, Ludwig-Maximilian-University München (LMU), Munich, 81377, Germany.

\* Correspondence: Simone Kreth, MD, PhD. Walter Brendel Center of Experimental Medicine, Ludwig-Maximilian-University München (LMU). Marchioninistreet 68, 81377, Munich, Germany. [simone.kreth@med.uni-muenchen.de](mailto:simone.kreth@med.uni-muenchen.de). +49 - 89 - 2180 76508

## Appendix

Appendix Figure S1 No T cell immunostimulatory effect of BHB.

Appendix Figure S2 No nonspecific immune stimulation through ketogenic diet *in vivo*.

Appendix Table 1: qRT-PCR Primer and Probes

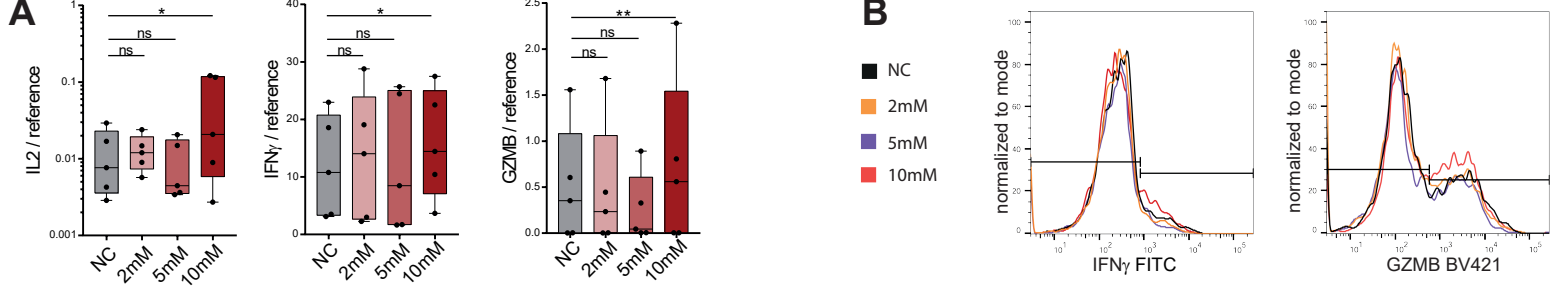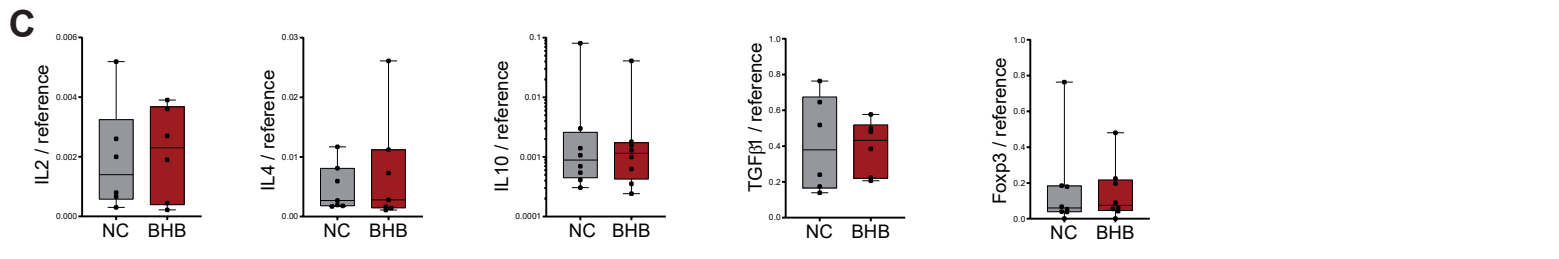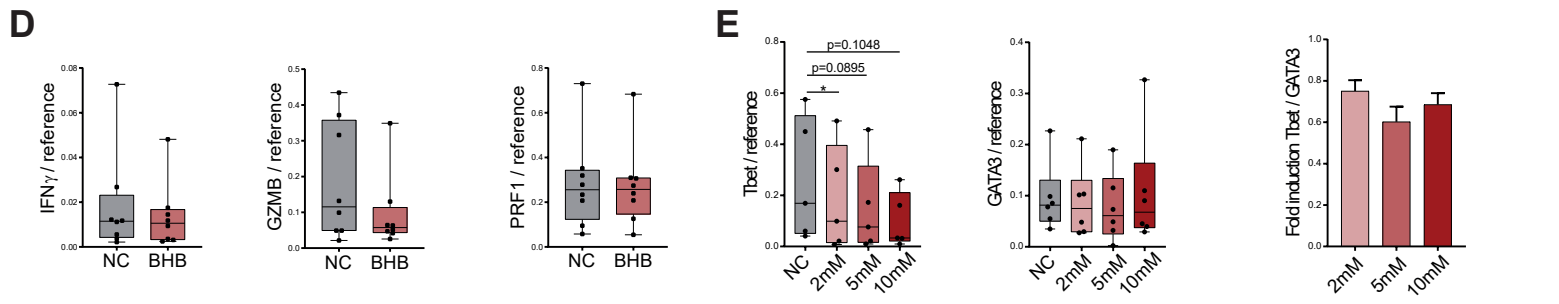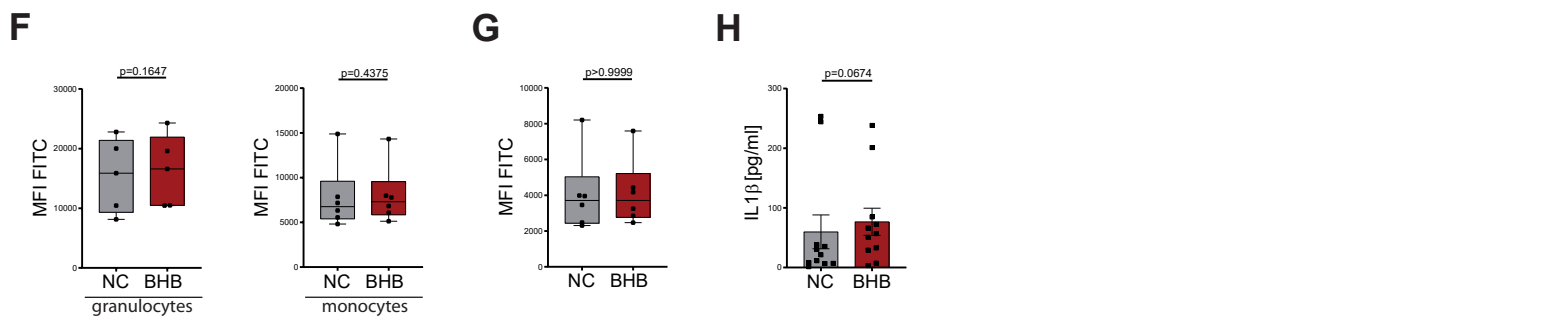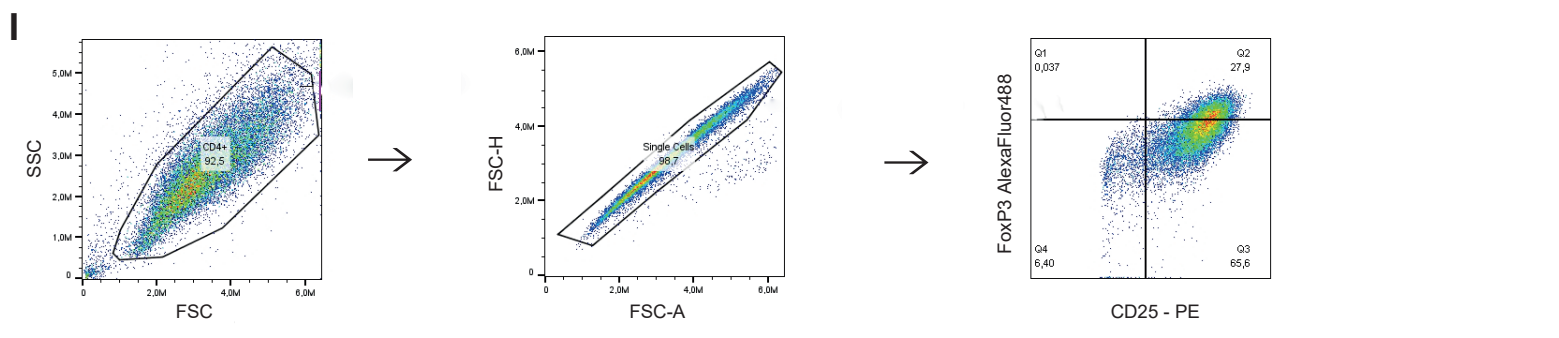

### **Appendix Figure S1 No T cell immunostimulatory effect of BHB.**

Human peripheral blood mononuclear cells (PBMCs) were cultivated for 48h in RPMI containing 80mg/dl glucose (NC) and supplemented with 2mM, 5mM and 10mM (Figure S1a/b/e) or only 10mM beta-hydroxybutyrate (BHB | all others). Human whole blood cells were incubated at 37°C for three hours and supplemented with 10mM BHB. **A** Expression of IL2, IFN $\gamma$  and GZMB mRNA relative to endogenous controls. T cell stimulation was performed through CD3/CD28 Dynabeads at a bead:cell ratio of 1:8. Human pan T cell RNA was isolated after 48 hours, n=5 biological replicates. **B** Flow cytometric quantification of intracellular IFN $\gamma$  and GZMB protein expression in human Pan T cells cultivated with varying concentrations of BHB as indicated. T cell stimulation as described above. Histogram plot, representative of three individual experiments from three biological replicates. **C** mRNA expression of CD4<sup>+</sup> cytokines IL2, IL4, IL10, TGF $\beta$ 1 and Foxp3 in native human T cells relative to internal controls, n=6/7/9/6/8 biological replicates. **D** mRNA expression of CD8<sup>+</sup> cytokines IFN $\gamma$ , GZMB and PRF1 in native human T cells relative to internal controls. n=9/8/8 biological replicates. **E** Th<sub>1</sub>/Th<sub>2</sub> cell transcription factors Tbet and GATA3 quantified via RT-qPCR in human Pan T cells cultivated with varying concentrations of BHB as indicated and the respective ratio of fold induction Tbet/GATA3 mRNA expression, n=6 biological replicates. **F** Phagocytic activity in human granulocytes and monocytes incubated with green E. coli, indicated by mean fluorescence intensity (MFI) FITC, n=6 biological replicates. **G** Quantification of cellular Respiratory Burst after LPS stimulation, using CellROX dye, indicated by mean fluorescence intensity (MFI) FITC in human granulocytes, n=6 biological replicates. **H** IL1 $\beta$  protein expression in the supernatant of stimulated PBMCs, n=13 biological replicates. **I** Representative gating strategy for flow cytometric quantification of human T<sub>reg</sub> after 5 days of T<sub>reg</sub> differentiation. Data depicted as mean  $\pm$  SEM (protein data) and box plots with median, twenty-fifth and seventy-fifth percentiles and range (all other). Dots indicating individual values. \*p<0.05, \*\*p<0.01, \*\*\*p<0.001, paired t-test/ Wilcoxon matched-pairs signed rank test, as appropriate.

**A**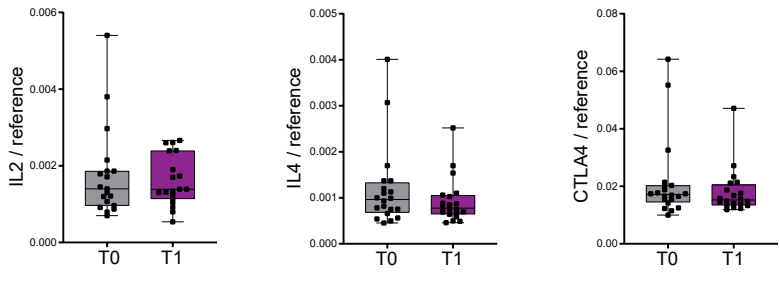**B**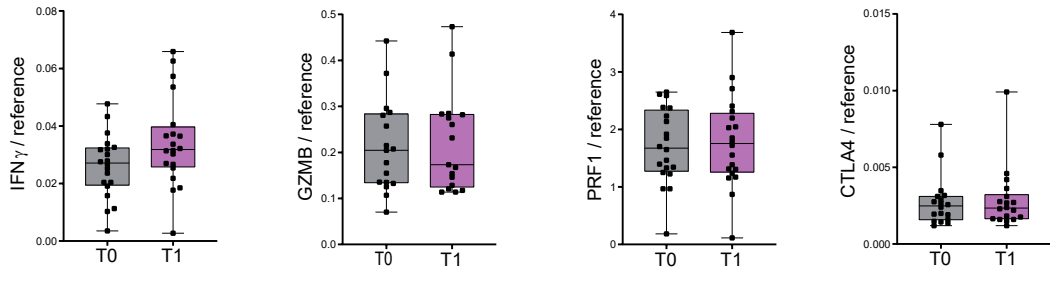**C**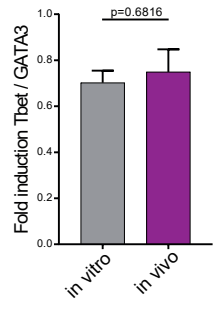

**Appendix Figure S2 No nonspecific immune stimulation through ketogenic diet *in vivo*.**

44 healthy volunteers conducted a three-week ketogenic diet (KD) with a limited carbohydrate consumption of <30g per day. Blood was taken and analyzed before starting the diet ( $T_0$ ) and again after three weeks of strict adherence to the diet ( $T_1$ ). PBMCs were isolated. CD4<sup>+</sup>/CD8<sup>+</sup> T cells were separated via magnetic cell labeling. **A** IL2, IL4 and CTLA4 mRNA expression in unstimulated CD4<sup>+</sup> T cells, n=20 individual human subjects. Quantification cycles for IL10 have been above the detection threshold. **B** IFN $\gamma$ , GZMB, PRF1 and CTLA4 mRNA expression in unstimulated CD8<sup>+</sup> T cells, n=20 individual human subjects. **C** Ratio of fold induction Tbet/GATA3 mRNA expression in vitro (BHB/NC) and in vivo ( $T_1/T_0$ ), n=6. Data depicted as mean with standard error mean (S2c) or box plots with median, twenty-fifth and seventy-fifth percentiles and range (all other). Dots indicating individual values. Unpaired t-test (Figure S2c), Paired t-test/ Wilcoxon matched-pairs signed rank test, as appropriate.

**Appendix Table S1: qRT-PCR Primer and Probes**

| Target  | Primer for                                    | Primer rev                       | Probe |
|---------|-----------------------------------------------|----------------------------------|-------|
| TBP     | 5' GAACATCATGGATCAGAACAACA 3'                 | 5' ATAGGGATTCCGGGAGTCAT 3'       | 87    |
| SDHA    | 5' GAGGCAGGGTTTAATACAGCA 3'                   | 5' CCAGTTGTCCTCCTCCATGT 3'       | 132   |
| b-Aktin | 5' CCAACCGCGAGAAGATGA 3'                      | 5' CCAGAGGCGTACAGGGATA 3'        | 64    |
| TGFB1   | 5' ACTACTACGCCAAGGAGGTCA 3'                   | 5' TGCTTGAAC TTGTCATAGATTTTCG 3' | 31    |
| PRF1    | 5' CACTCACAGGCAGCCAAC 3'                      | 5' GGGAGTGTGTACCACATGGA 3'       | 26    |
| GZMB    | 5' GGGGGACCCAGAGATTA AAA 3'                   | 5' CCATTGTTTTCGTCCATAGGAG 3'     | 37    |
| IL2     | 5' AAGTTTTACATGCCCAAGAAG 3'                   | 5' AAGTGAAAGTTTTTGCTTTTCAGCT 3'  | 65    |
| IL4     | 5' TGCCTCACATTGTCACTGC 3'                     | 5' GCACATGCTAGCAGGAAGAAC 3'      | 38    |
| IL6     | 5' GATGAGTACAAAAGTCCTGATCCA 3'                | 5' CTGCAGCCACTGGTTCTGT 3'        | 7     |
| IL7     | 5' TATGGGCGGTGAGAGCTT 3'                      | 5' AGGGGAGGAAGTCCAAAGATA 3'      | 15    |
| IL7R    | 5' GCTTTTGAGGACCCAGATGT 3'                    | 5' AGGCAGTTTACCTCCACGAG 3'       | 9     |
| IL10    | 5' TGCCTTCAGCAGAGTGAAGA 3'                    | 5' GCAACCCAGGTAACCCTTAAA 3'      | 67    |
| IL15    | 5' GGAGTGAAGCTACAGACCTTCG 3'                  | 5' TTGAAGAGCTGGCTATGG 3'         | 66    |
| IFNy    | 5' GGCATTTTGAAGAATTGGAAAG 3'                  | 5' TTTGGATGCTCTGGTCATCTT 3'      | 21    |
| Foxp3   | 5' CCTTGCCCCACTTACAGG 3'                      | 5' CCACCGTTGAGAGCTCCT 3'         | 65    |
| CTLA4   | 5' TCACAGCTGTTTCTTTGAGCA 3'                   | 5' AGGCTGAAATTGCTTTTCACA 3'      | 21    |
| Tbet    | 5' TGGGTGCAGTGTGAAAAG 3'                      | 5' TCCTGTGTTGGGGGAGTC 3'         | 72    |
| GATA3   | 5' CTCATTAAGCCCAAGCGAAG 3'                    | 5' TCTGACAGTTCGCACAGGAC 3'       | 71    |
| IL8     | Roche RealTime Ready Single Assay   ID 103136 |                                  |       |
